# Supplementary material
Source: PubMed Central journal article supplement (PMC5199238)
Supplement: NIHMS831353-supplement-2.pdf [file NIHMS831353-supplement-2.pdf]

**Supplemental Material**

**Mathematica Notebooks**

**General expressions for  $R_{1\rho}$  relaxation for  $N$ -site chemical exchange  
and the special case of linear chains**

**Hans Koss<sup>1</sup>, Mark Rance<sup>2</sup> and Arthur G. Palmer, III<sup>1</sup>**

**<sup>1</sup>Department of Biochemistry and Molecular Biophysics, Columbia University, 630 West  
168th Street, New York, NY 10032**

**<sup>2</sup>Department of Molecular Genetics, Biochemistry and Microbiology, University of  
Cincinnati, Cincinnati, OH 45267**

The following document contains printouts of the Mathematica notebooks entitled:

twosite\_allcalculations.nb  
threesite\_allcalculations.nb  
foursite\_allcalculations.nb

and is intended for readers who are unable to open the actual mathematic notebook files.

This defines some L, I, and R matrices (or a combination of L+R), deltaR, some rate constants - note that  $k_{32ex}=k_{23ft}+k_{32ft}$  (and similar).  $k_{13ftl}$  and  $k_{13ft}$  (and similar) only differ in that  $k_{13ftl}$  does not contain a dummy  $k_{32ex}$  variable. Herein,  $\theta$ ,  $\cos^2(\theta)$ ,  $\sin^2(\theta)$  are also defined in this block.

```

In[780]:= Off[General::luc]
I3 = IdentityMatrix[3];
BigI = ArrayFlatten[{{I3, 0 I3, 0 I3}, {0 I3, I3, 0 I3}, {0 I3, 0 I3, I3}}];
MatrixForm[BigI]
LA = {{0, -WA, 0}, {WA, 0, -w1}, {0, w1, 0}};
LC = {{0, -WC, 0}, {WC, 0, -w1}, {0, w1, 0}};
LB = {{0, -WB, 0}, {WB, 0, -w1}, {0, w1, 0}};
MatrixForm[LA];
MatrixForm[LC];
MatrixForm[LB];
BigLtr[WA_, WB_, WC_, w1_] =
  ArrayFlatten[{{LA, 0 I3, 0 I3}, {0 I3, LB, 0 I3}, {0 I3, 0 I3, LC}}];
MatrixForm[BigLtr[WA, WB, WC, w1]]
RAR = {{0, 0, 0}, {0, 0, 0}, {0, 0, R2 - R1}};
RBR = {{0, 0, 0}, {0, 0, 0}, {0, 0, R2 - R1}};
RCR = {{0, 0, 0}, {0, 0, 0}, {0, 0, R2 - R1}};
BigDRr[R1_, R2_] =
  ArrayFlatten[{{RAR, 0 I3, 0 I3}, {0 I3, RBR, 0 I3}, {0 I3, 0 I3, RCR}}]
MatrixForm[BigDRr[R1, R2]]
LAR = {{-R2, -WA, 0}, {WA, -R2, -w1}, {0, w1, -R1}};
LBR = {{-R2, -WB, 0}, {WB, -R2, -w1}, {0, w1, -R1}};
LCR = {{-R2, -WC, 0}, {WC, -R2, -w1}, {0, w1, -R1}};
BigLtrr[R1_, R2_, WA_, WB_, WC_, w1_] =
  ArrayFlatten[{{LAR, 0 I3, 0 I3}, {0 I3, LBR, 0 I3}, {0 I3, 0 I3, LCR}}]
MatrixForm[BigLtrr[R1, R2, WA, WB, WC, w1]]
theta[DELTAO_, WB_, WC_, w1_, Pa_, Pb_, Pc_] :=
  ArcSin[Sqrt[(w1^2) / (w1^2 + (Pa * (DELTAO - Pb * WB - Pc * WC) + Pb *
    (WB + (DELTAO - Pb * WB - Pc * WC)) + Pc * (WC + DELTAO - Pb * WB - Pc * WC)) ^ 2)]];
cossq[DELTAO_, WB_, WC_, w1_, Pa_, Pb_, Pc_] :=
  Cos[theta[DELTAO, WB, WC, w1, Pa, Pb, Pc]]^2;
sinsq[DELTAO_, WB_, WC_, w1_, Pa_, Pb_, Pc_] :=
  Sin[theta[DELTAO, WB, WC, w1, Pa, Pb, Pc]]^2;
k23ft[k21ex_, k31ex_, k32ex_, Pa_, Pb_, Pc_] = k32ex / (1 + Pb / Pc);
k13ft[k21ex_, k31ex_, k32ex_, Pa_, Pb_, Pc_] = k31ex / (1 + Pa / Pc);
k12ft[k21ex_, k31ex_, k32ex_, Pa_, Pb_, Pc_] = k21ex / (1 + Pa / Pb);
k32ft[k21ex_, k31ex_, k32ex_, Pa_, Pb_, Pc_] = k32ex - k32ex / (1 + Pb / Pc);
k31ft[k21ex_, k31ex_, k32ex_, Pa_, Pb_, Pc_] = k31ex - k31ex / (1 + Pa / Pc);
k21ft[k21ex_, k31ex_, k32ex_, Pa_, Pb_, Pc_] = k21ex - k21ex / (1 + Pa / Pb);
k13ftl[k21ex_, k31ex_, Pa_, Pb_, Pc_] = k31ex / (1 + Pa / Pc);
k12ftl[k21ex_, k31ex_, Pa_, Pb_, Pc_] = k21ex / (1 + Pa / Pb);
k31ftl[k21ex_, k31ex_, Pa_, Pb_, Pc_] = k31ex - k31ex / (1 + Pa / Pc);
k21ftl[k21ex_, k31ex_, Pa_, Pb_, Pc_] = k21ex - k21ex / (1 + Pa / Pb);

```

Out[783]/MatrixForm=

$$\begin{pmatrix} 1 & 0 & 0 & 0 & 0 & 0 & 0 & 0 & 0 \\ 0 & 1 & 0 & 0 & 0 & 0 & 0 & 0 & 0 \\ 0 & 0 & 1 & 0 & 0 & 0 & 0 & 0 & 0 \\ 0 & 0 & 0 & 1 & 0 & 0 & 0 & 0 & 0 \\ 0 & 0 & 0 & 0 & 1 & 0 & 0 & 0 & 0 \\ 0 & 0 & 0 & 0 & 0 & 1 & 0 & 0 & 0 \\ 0 & 0 & 0 & 0 & 0 & 0 & 1 & 0 & 0 \\ 0 & 0 & 0 & 0 & 0 & 0 & 0 & 1 & 0 \\ 0 & 0 & 0 & 0 & 0 & 0 & 0 & 0 & 1 \end{pmatrix}$$

Out[791]/MatrixForm=

$$\begin{pmatrix} 0 & -WA & 0 & 0 & 0 & 0 & 0 & 0 & 0 \\ WA & 0 & -w1 & 0 & 0 & 0 & 0 & 0 & 0 \\ 0 & w1 & 0 & 0 & 0 & 0 & 0 & 0 & 0 \\ 0 & 0 & 0 & 0 & -WB & 0 & 0 & 0 & 0 \\ 0 & 0 & 0 & WB & 0 & -w1 & 0 & 0 & 0 \\ 0 & 0 & 0 & 0 & w1 & 0 & 0 & 0 & 0 \\ 0 & 0 & 0 & 0 & 0 & 0 & 0 & -WC & 0 \\ 0 & 0 & 0 & 0 & 0 & 0 & WC & 0 & -w1 \\ 0 & 0 & 0 & 0 & 0 & 0 & 0 & w1 & 0 \end{pmatrix}$$

Out[795]= {{0, 0, 0, 0, 0, 0, 0, 0, 0}, {0, 0, 0, 0, 0, 0, 0, 0, 0}, {0, 0, -R1 + R2, 0, 0, 0, 0, 0, 0},  
 {0, 0, 0, 0, 0, 0, 0, 0, 0}, {0, 0, 0, 0, 0, 0, 0, 0, 0}, {0, 0, 0, 0, 0, -R1 + R2, 0, 0, 0},  
 {0, 0, 0, 0, 0, 0, 0, 0, 0}, {0, 0, 0, 0, 0, 0, 0, 0, 0}, {0, 0, 0, 0, 0, 0, 0, 0, -R1 + R2}}

Out[796]/MatrixForm=

$$\begin{pmatrix} 0 & 0 & 0 & 0 & 0 & 0 & 0 & 0 & 0 \\ 0 & 0 & 0 & 0 & 0 & 0 & 0 & 0 & 0 \\ 0 & 0 & -R1 + R2 & 0 & 0 & 0 & 0 & 0 & 0 \\ 0 & 0 & 0 & 0 & 0 & 0 & 0 & 0 & 0 \\ 0 & 0 & 0 & 0 & 0 & 0 & 0 & 0 & 0 \\ 0 & 0 & 0 & 0 & 0 & -R1 + R2 & 0 & 0 & 0 \\ 0 & 0 & 0 & 0 & 0 & 0 & 0 & 0 & 0 \\ 0 & 0 & 0 & 0 & 0 & 0 & 0 & 0 & 0 \\ 0 & 0 & 0 & 0 & 0 & 0 & 0 & 0 & -R1 + R2 \end{pmatrix}$$

Out[800]= {{-R2, -WA, 0, 0, 0, 0, 0, 0, 0},  
 {WA, -R2, -w1, 0, 0, 0, 0, 0, 0}, {0, w1, -R1, 0, 0, 0, 0, 0, 0},  
 {0, 0, 0, -R2, -WB, 0, 0, 0, 0}, {0, 0, 0, WB, -R2, -w1, 0, 0, 0},  
 {0, 0, 0, 0, w1, -R1, 0, 0, 0}, {0, 0, 0, 0, 0, 0, -R2, -WC, 0},  
 {0, 0, 0, 0, 0, 0, WC, -R2, -w1}, {0, 0, 0, 0, 0, 0, 0, w1, -R1}}

Out[801]/MatrixForm=

$$\begin{pmatrix} -R2 & -WA & 0 & 0 & 0 & 0 & 0 & 0 & 0 \\ WA & -R2 & -w1 & 0 & 0 & 0 & 0 & 0 & 0 \\ 0 & w1 & -R1 & 0 & 0 & 0 & 0 & 0 & 0 \\ 0 & 0 & 0 & -R2 & -WB & 0 & 0 & 0 & 0 \\ 0 & 0 & 0 & WB & -R2 & -w1 & 0 & 0 & 0 \\ 0 & 0 & 0 & 0 & w1 & -R1 & 0 & 0 & 0 \\ 0 & 0 & 0 & 0 & 0 & 0 & -R2 & -WC & 0 \\ 0 & 0 & 0 & 0 & 0 & 0 & WC & -R2 & -w1 \\ 0 & 0 & 0 & 0 & 0 & 0 & 0 & w1 & -R1 \end{pmatrix}$$

**K matrices for 3-site linear and triangular schemes are produced. Matrices and expressions for the Woodbury approximation are defined. First order approximations (Eq. 11) and expressions to obtain numerical (least negative eigenvalue) results for linear and triangular schemes are defined.**

In[815]=

**Ktriangular[k21ex\_, k31ex\_, k32ex\_, Pa\_, Pb\_, Pc\_] = ArrayFlatten[**

```

{{{-k12ft[k21ex, k31ex, k32ex, Pa, Pb, Pc] - k13ft[k21ex, k31ex, k32ex, Pa, Pb, Pc]}
  I3, k21ft[k21ex, k31ex, k32ex, Pa, Pb, Pc] I3,
  k31ft[k21ex, k31ex, k32ex, Pa, Pb, Pc] I3}},
{k12ft[k21ex, k31ex, k32ex, Pa, Pb, Pc] I3,
  (-k21ft[k21ex, k31ex, k32ex, Pa, Pb, Pc] - k23ft[k21ex, k31ex, k32ex, Pa, Pb, Pc])
  I3, k32ft[k21ex, k31ex, k32ex, Pa, Pb, Pc] I3}},
{k13ft[k21ex, k31ex, k32ex, Pa, Pb, Pc] I3, k23ft[k21ex, k31ex, k32ex, Pa, Pb, Pc]
  I3, (-k31ft[k21ex, k31ex, k32ex, Pa, Pb, Pc] -
  k32ft[k21ex, k31ex, k32ex, Pa, Pb, Pc]) I3}}];
Klinear[k21ex_, k31ex_, k32ex_, Pa_, Pb_, Pc_] = ArrayFlatten[
{{{-k12ft[k21ex, k31ex, k32ex, Pa, Pb, Pc] - k13ft[k21ex, k31ex, k32ex, Pa, Pb, Pc]}
  I3, k21ft[k21ex, k31ex, k32ex, Pa, Pb, Pc] I3,
  k31ft[k21ex, k31ex, k32ex, Pa, Pb, Pc] I3}},
{k12ft[k21ex, k31ex, k32ex, Pa, Pb, Pc] I3,
  -k21ft[k21ex, k31ex, k32ex, Pa, Pb, Pc] I3, 0 I3},
{k13ft[k21ex, k31ex, k32ex, Pa, Pb, Pc] I3, 0 I3,
  -k31ft[k21ex, k31ex, k32ex, Pa, Pb, Pc] I3}}];
Umat = ArrayFlatten[{{0 I3}, {I3}, {-I3}}];
MatrixForm[Umat]
Vmat[k21ex_, k31ex_, k32ex_, Pa_, Pb_, Pc_] =
  ArrayFlatten[{{0 I3, -k23ft[k21ex, k31ex, k32ex, Pa, Pb, Pc] I3,
  k32ft[k21ex, k31ex, k32ex, Pa, Pb, Pc] I3}}];
MatrixForm[Vmat[k21ex_, k31ex_, k32ex_, Pa_, Pb_, Pc_]]
MatrixForm[Klinear[k21ex_, k31ex_, k32ex_, Pa_, Pb_, Pc_]]
MatrixForm[Ktriangular[k21ex_, k31ex_, k32ex_, Pa_, Pb_, Pc_]]
InvLK[DELTAO_, WB_, WC_, w1_, k21ex_, k31ex_, k32ex_, Pa_, Pb_, Pc_] :=
  Inverse[BigLtr[DELTAO - Pb * WB - Pc * WC, WB + (DELTAO - Pb * WB - Pc * WC),
  WC + (DELTAO - Pb * WB - Pc * WC), w1] + Klinear[k21ex, k31ex, k32ex, Pa, Pb, Pc]];
ZWoodbury[DELTAO_, WB_, WC_, w1_, k21ex_, k31ex_, k32ex_, Pa_, Pb_, Pc_] :=
  Tr[InvLK[DELTAO, WB, WC, w1, k21ex, k31ex, k32ex, Pa, Pb, Pc].Umat.
  Inverse[I3 + Vmat[k21ex, k31ex, k32ex, Pa, Pb, Pc].InvLK[DELTAO, WB, WC, w1, k21ex,
  k31ex, k32ex, Pa, Pb, Pc].Umat].Vmat[k21ex, k31ex, k32ex, Pa, Pb, Pc].
  InvLK[DELTAO, WB, WC, w1, k21ex, k31ex, k32ex, Pa, Pb, Pc]]

threelinearfirstorder[DELTAO_, WB_,
  WC_, w1_, k21ex_, k31ex_, k32ex_, Pa_, Pb_, Pc_] :=
  -(1/Tr[Inverse[BigLtr[DELTAO - Pb * WB - Pc * WC, WB + (DELTAO - Pb * WB - Pc * WC),
  WC + (DELTAO - Pb * WB - Pc * WC), w1] + Klinear[k21ex, k31ex,
  k32ex, Pa, Pb, Pc]]]) / sinsq[DELTAO, WB, WC, w1, Pa, Pb, Pc];
threetriangularfirstorder[DELTAO_, WB_, WC_, w1_, k21ex_, k31ex_,
  k32ex_, Pa_, Pb_, Pc_] :=
  -(1/Tr[Inverse[BigLtr[DELTAO - Pb * WB - Pc * WC, WB + (DELTAO - Pb * WB - Pc * WC),
  WC + (DELTAO - Pb * WB - Pc * WC), w1] + Ktriangular[k21ex, k31ex,

```

```

k32ex, Pa, Pb, Pc]])/sinsq[DELTAO, WB, WC, w1, Pa, Pb, Pc];
threetriangularexact[DELTAO_, WB_, WC_, w1_, k21ex_, k31ex_, k32ex_, Pa_, Pb_, Pc_] :=
-N[Re[Eigenvalues[
Ktriangular[k21ex, k31ex, k32ex, Pa, Pb, Pc] + BigLtr[DELTAO - Pb * WB - Pc * WC,
WB + (DELTAO - Pb * WB - Pc * WC), WC + (DELTAO - Pb * WB - Pc * WC), w1]]]][[
9]]/sinsq[DELTAO, WB, WC, w1, Pa, Pb, Pc];
threelinearexact[DELTAO_, WB_, WC_, w1_, k21ex_, k31ex_, k32ex_, Pa_, Pb_, Pc_] :=
-N[Re[Eigenvalues[
Klinear[k21ex, k31ex, k32ex, Pa, Pb, Pc] + BigLtr[DELTAO - Pb * WB - Pc * WC,
WB + (DELTAO - Pb * WB - Pc * WC), WC + (DELTAO - Pb * WB - Pc * WC), w1]]]][[
9]]/sinsq[DELTAO, WB, WC, w1, Pa, Pb, Pc];

```

Out[818]/MatrixForm=

$$\begin{pmatrix} 0 & 0 & 0 \\ 0 & 0 & 0 \\ 0 & 0 & 0 \\ 1 & 0 & 0 \\ 0 & 1 & 0 \\ 0 & 0 & 1 \\ -1 & 0 & 0 \\ 0 & -1 & 0 \\ 0 & 0 & -1 \end{pmatrix}$$

Out[820]/MatrixForm=

$$\begin{pmatrix} 0 & 0 & 0 & -\frac{k32ex}{1+\frac{Pb}{Pc}} & 0 & 0 & k32ex - \frac{k32ex}{1+\frac{Pb}{Pc}} & 0 & 0 \\ 0 & 0 & 0 & 0 & -\frac{k32ex}{1+\frac{Pb}{Pc}} & 0 & 0 & k32ex - \frac{k32ex}{1+\frac{Pb}{Pc}} & 0 \\ 0 & 0 & 0 & 0 & 0 & -\frac{k32ex}{1+\frac{Pb}{Pc}} & 0 & 0 & k32ex - \frac{k32ex}{1+\frac{Pb}{Pc}} \end{pmatrix}$$

Out[821]/MatrixForm=

$$\begin{pmatrix} -\frac{k21ex}{1+\frac{Pa}{Pb}} - \frac{k31ex}{1+\frac{Pa}{Pc}} & 0 & 0 & 0 & k21ex - \frac{k21ex}{1+\frac{Pa}{Pb}} & 0 & 0 \\ 0 & -\frac{k21ex}{1+\frac{Pa}{Pb}} - \frac{k31ex}{1+\frac{Pa}{Pc}} & 0 & 0 & 0 & k21ex - \frac{k21ex}{1+\frac{Pa}{Pb}} & 0 \\ 0 & 0 & -\frac{k21ex}{1+\frac{Pa}{Pb}} - \frac{k31ex}{1+\frac{Pa}{Pc}} & 0 & 0 & 0 & k21ex - \frac{k21ex}{1+\frac{Pa}{Pb}} \\ \frac{k21ex}{1+\frac{Pa}{Pb}} & 0 & 0 & -k21ex + \frac{k21ex}{1+\frac{Pa}{Pb}} & 0 & 0 & 0 \\ 0 & \frac{k21ex}{1+\frac{Pa}{Pb}} & 0 & 0 & -k21ex + \frac{k21ex}{1+\frac{Pa}{Pb}} & 0 & 0 \\ 0 & 0 & \frac{k21ex}{1+\frac{Pa}{Pb}} & 0 & 0 & 0 & -k21ex + \frac{k21ex}{1+\frac{Pa}{Pb}} \\ \frac{k31ex}{1+\frac{Pa}{Pc}} & 0 & 0 & 0 & 0 & 0 & 0 \\ 0 & \frac{k31ex}{1+\frac{Pa}{Pc}} & 0 & 0 & 0 & 0 & 0 \\ 0 & 0 & \frac{k31ex}{1+\frac{Pa}{Pc}} & 0 & 0 & 0 & 0 \end{pmatrix}$$

Out[822]/MatrixForm=

$$\begin{pmatrix}
 -\frac{k_{21}ex\_}{1+\frac{Pa\_}{Pb\_}} - \frac{k_{31}ex\_}{1+\frac{Pa\_}{Pc\_}} & 0 & 0 & k_{21}ex\_ - \frac{k_{21}ex\_}{1+\frac{Pa\_}{Pb\_}} & 0 \\
 0 & -\frac{k_{21}ex\_}{1+\frac{Pa\_}{Pb\_}} - \frac{k_{31}ex\_}{1+\frac{Pa\_}{Pc\_}} & 0 & 0 & k_{21}ex\_ - \frac{k_{21}ex\_}{1+\frac{Pa\_}{Pb\_}} \\
 0 & 0 & -\frac{k_{21}ex\_}{1+\frac{Pa\_}{Pb\_}} - \frac{k_{31}ex\_}{1+\frac{Pa\_}{Pc\_}} & 0 & 0 \\
 \frac{k_{21}ex\_}{1+\frac{Pa\_}{Pb\_}} & 0 & 0 & -k_{21}ex\_ + \frac{k_{21}ex\_}{1+\frac{Pa\_}{Pb\_}} - \frac{k_{32}ex\_}{1+\frac{Pb\_}{Pc\_}} & 0 \\
 0 & \frac{k_{21}ex\_}{1+\frac{Pa\_}{Pb\_}} & 0 & 0 & -k_{21}ex\_ + \frac{k_{21}ex\_}{1+\frac{Pa\_}{Pb\_}} - \frac{k_{32}ex\_}{1+\frac{Pb\_}{Pc\_}} \\
 0 & 0 & \frac{k_{21}ex\_}{1+\frac{Pa\_}{Pb\_}} & 0 & 0 \\
 \frac{k_{31}ex\_}{1+\frac{Pa\_}{Pc\_}} & 0 & 0 & \frac{k_{32}ex\_}{1+\frac{Pb\_}{Pc\_}} & 0 \\
 0 & \frac{k_{31}ex\_}{1+\frac{Pa\_}{Pc\_}} & 0 & 0 & \frac{k_{32}ex\_}{1+\frac{Pb\_}{Pc\_}} \\
 0 & 0 & \frac{k_{31}ex\_}{1+\frac{Pa\_}{Pc\_}} & 0 & 0
 \end{pmatrix}$$

The following calculates a second order approximation of Rex for a 3-state linear kinetic scheme. (Eqs. 24, 35-40). L defined slightly differently from above, for input convenience.

```

In[829]:= LAY[DELTAO_, WB_, WC_, w1_, Pa_, Pb_, Pc_] =
  {{0, -(DELTAO - Pb * WB - Pc * WC), 0}, {(DELTAO - Pb * WB - Pc * WC), 0, -w1}, {0, w1, 0}};
LBY[DELTAO_, WB_, WC_, w1_, Pa_, Pb_, Pc_] = {{0, -(WB + DELTAO - Pb * WB - Pc * WC), 0},
  {WB + DELTAO - Pb * WB - Pc * WC, 0, -w1}, {0, w1, 0}};
LCY[DELTAO_, WB_, WC_, w1_, Pa_, Pb_, Pc_] = {{0, -(WC + DELTAO - Pb * WB - Pc * WC), 0},
  {WC + DELTAO - Pb * WB - Pc * WC, 0, -w1}, {0, w1, 0}};
MatrixForm[LAY[DELTAO_, WB_, WC_, w1_, Pa_, Pb_, Pc_]]
MatrixForm[LBY[DELTAO_, WB_, WC_, w1_, Pa_, Pb_, Pc_]]
MatrixForm[LCY[DELTAO_, WB_, WC_, w1_, Pa_, Pb_, Pc_]]
LAz[DELTAO_, WB_, WC_, w1_, Pa_, Pb_, Pc_, k21ex_, k31ex_] =
  LAY[DELTAO, WB, WC, w1, Pa, Pb, Pc] -
  (k12ftl[k21ex, k31ex, Pa, Pb, Pc] + k13ftl[k21ex, k31ex, Pa, Pb, Pc]) * I3;
LBz[DELTAO_, WB_, WC_, w1_, Pa_, Pb_, Pc_, k21ex_, k31ex_] =
  LBY[DELTAO, WB, WC, w1, Pa, Pb, Pc] - k21ftl[k21ex, k31ex, Pa, Pb, Pc] * I3;
LCz[DELTAO_, WB_, WC_, w1_, Pa_, Pb_, Pc_, k21ex_, k31ex_] =
  LCY[DELTAO, WB, WC, w1, Pa, Pb, Pc] - k31ftl[k21ex, k31ex, Pa, Pb, Pc] * I3;
Zmat[DELTAO_, WB_, WC_, w1_, Pa_, Pb_, Pc_, k21ex_, k31ex_] :=
  LBz[DELTAO, WB, WC, w1, Pa, Pb, Pc, k21ex, k31ex].LAz[DELTAO, WB, WC, w1, Pa,
  Pb, Pc, k21ex, k31ex].LCz[DELTAO, WB, WC, w1, Pa, Pb, Pc, k21ex, k31ex] -
  k13ftl[k21ex, k31ex, Pa, Pb, Pc] * k31ftl[k21ex, k31ex, Pa, Pb, Pc] *
  LBz[DELTAO, WB, WC, w1, Pa, Pb, Pc, k21ex, k31ex] -
  k12ftl[k21ex, k31ex, Pa, Pb, Pc] * k21ftl[k21ex, k31ex, Pa, Pb, Pc] *
  LCz[DELTAO, WB, WC, w1, Pa, Pb, Pc, k21ex, k31ex];
Xmat[DELTAO_, WB_, WC_, w1_, Pa_, Pb_, Pc_, k21ex_, k31ex_] :=
  LBz[DELTAO, WB, WC, w1, Pa, Pb, Pc, k21ex, k31ex].
  LAz[DELTAO, WB, WC, w1, Pa, Pb, Pc, k21ex, k31ex] +

```

```

LAz[DELTAO, WB, WC, w1, Pa, Pb, Pc, k2lex, k3lex].LCz[DELTAO, WB, WC, w1, Pa,
  Pb, Pc, k2lex, k3lex] + LBz[DELTAO, WB, WC, w1, Pa, Pb, Pc, k2lex, k3lex].
  LCz[DELTAO, WB, WC, w1, Pa, Pb, Pc, k2lex, k3lex] -
  ((k12ft1[k2lex, k3lex, Pa, Pb, Pc] * k21ft1[k2lex, k3lex, Pa, Pb, Pc] +
    k13ft1[k2lex, k3lex, Pa, Pb, Pc] * k31ft1[k2lex, k3lex, Pa, Pb, Pc]) * I3);
Ymat[DELTAO_, WB_, WC_, w1_, Pa_, Pb_, Pc_, k2lex_, k3lex_] :=
  LBz[DELTAO, WB, WC, w1, Pa, Pb, Pc, k2lex, k3lex] + LAz[DELTAO, WB, WC, w1, Pa,
    Pb, Pc, k2lex, k3lex] + LCz[DELTAO, WB, WC, w1, Pa, Pb, Pc, k2lex, k3lex];
threelinearsecondorder[DELTAO_, WB_, WC_, w1_, k2lex_,
  k3lex_, k32ex_, Pa_, Pb_, Pc_] :=
  - (1 / (Tr[Inverse[Zmat[DELTAO, WB, WC, w1, Pa, Pb, Pc, k2lex, k3lex]].Xmat[DELTAO,
    WB, WC, w1, Pa, Pb, Pc, k2lex, k3lex]] -
    Tr[Inverse[Zmat[DELTAO, WB, WC, w1, Pa, Pb, Pc, k2lex, k3lex]].
      Ymat[DELTAO, WB, WC, w1, Pa, Pb, Pc, k2lex, k3lex] +
      Minors[Inverse[Zmat[DELTAO, WB, WC, w1, Pa, Pb, Pc, k2lex, k3lex]].
        Xmat[DELTAO, WB, WC, w1, Pa, Pb, Pc, k2lex, k3lex]]] /
    Tr[Inverse[Zmat[DELTAO, WB, WC, w1, Pa, Pb, Pc, k2lex, k3lex]].
      Xmat[DELTAO, WB, WC, w1, Pa, Pb, Pc, k2lex, k3lex]])) /
  sinsq[DELTAO, WB, WC, w1, Pa, Pb, Pc];

```

Out[832]/MatrixForm=

$$\begin{pmatrix} 0 & -\text{DELTAO}_+ + \text{Pb}_- \text{WB}_- + \text{Pc}_- \text{WC}_- & 0 \\ \text{DELTAO}_- - \text{Pb}_- \text{WB}_- - \text{Pc}_- \text{WC}_- & 0 & -\text{w1}_- \\ 0 & \text{w1}_- & 0 \end{pmatrix}$$

Out[833]/MatrixForm=

$$\begin{pmatrix} 0 & -\text{DELTAO}_- - \text{WB}_- + \text{Pb}_- \text{WB}_- + \text{Pc}_- \text{WC}_- & 0 \\ \text{DELTAO}_+ + \text{WB}_- - \text{Pb}_- \text{WB}_- - \text{Pc}_- \text{WC}_- & 0 & -\text{w1}_- \\ 0 & \text{w1}_- & 0 \end{pmatrix}$$

Out[834]/MatrixForm=

$$\begin{pmatrix} 0 & -\text{DELTAO}_+ + \text{Pb}_- \text{WB}_- - \text{WC}_- + \text{Pc}_- \text{WC}_- & 0 \\ \text{DELTAO}_- - \text{Pb}_- \text{WB}_- + \text{WC}_- - \text{Pc}_- \text{WC}_- & 0 & -\text{w1}_- \\ 0 & \text{w1}_- & 0 \end{pmatrix}$$

**These are modified equations for a certain R1rho second order approximation (see below, R1rhothreelinearsecondorderReffLRK), replacing L' with L'+R.**

```

In[854]:= LAyr[R1_, R2_, DELTAO_, WB_, WC_, w1_, Pa_, Pb_, Pc_] =
  {{-R2, -(DELTAO - Pb * WB - Pc * WC), 0},
   {(DELTAO - Pb * WB - Pc * WC), -R2, -w1}, {0, w1, -R1}};
LByr[R1_, R2_, DELTAO_, WB_, WC_, w1_, Pa_, Pb_, Pc_] =
  {{-R2, -(WB + DELTAO - Pb * WB - Pc * WC), 0},
   {WB + DELTAO - Pb * WB - Pc * WC, -R2, -w1}, {0, w1, -R1}};
LCyr[R1_, R2_, DELTAO_, WB_, WC_, w1_, Pa_, Pb_, Pc_] =
  {{-R2, -(WC + DELTAO - Pb * WB - Pc * WC), 0},
   {WC + DELTAO - Pb * WB - Pc * WC, -R2, -w1}, {0, w1, -R1}};
MatrixForm[LAyr[R1, R2, DELTAO_, WB_, WC_, w1_, Pa_, Pb_, Pc_]]

```



```

MatrixForm[LByr[R1, R2, DELTAO_, WB_, WC_, w1_, Pa_, Pb_, Pc_]]
MatrixForm[LCyr[R1, R2, DELTAO_, WB_, WC_, w1_, Pa_, Pb_, Pc_]]
LAzr[R1_, R2_, DELTAO_, WB_, WC_, w1_, Pa_, Pb_, Pc_, k21ex_, k31ex_] =
  LAyr[R1, R2, DELTAO, WB, WC, w1, Pa, Pb, Pc] -
    (k12ftl[k21ex, k31ex, Pa, Pb, Pc] + k13ftl[k21ex, k31ex, Pa, Pb, Pc]) * I3;
LBzr[R1_, R2_, DELTAO_, WB_, WC_, w1_, Pa_, Pb_, Pc_, k21ex_, k31ex_] =
  LByr[R1, R2, DELTAO, WB, WC, w1, Pa, Pb, Pc] - k21ftl[k21ex, k31ex, Pa, Pb, Pc] * I3;
LCzr[R1_, R2_, DELTAO_, WB_, WC_, w1_, Pa_, Pb_, Pc_, k21ex_, k31ex_] =
  LCyr[R1, R2, DELTAO, WB, WC, w1, Pa, Pb, Pc] - k31ftl[k21ex, k31ex, Pa, Pb, Pc] * I3;

Zmatr[R1_, R2_, DELTAO_, WB_, WC_, w1_, Pa_, Pb_, Pc_, k21ex_, k31ex_] :=
  LBzr[R1, R2, DELTAO, WB, WC, w1, Pa, Pb, Pc, k21ex, k31ex].
  LAzr[R1, R2, DELTAO, WB, WC, w1, Pa, Pb, Pc, k21ex, k31ex].
  LCzr[R1, R2, DELTAO, WB, WC, w1, Pa, Pb, Pc, k21ex, k31ex] -
  k13ftl[k21ex, k31ex, Pa, Pb, Pc] * k31ftl[k21ex, k31ex, Pa, Pb, Pc] *
  LBzr[R1, R2, DELTAO, WB, WC, w1, Pa, Pb, Pc, k21ex, k31ex] -
  k12ftl[k21ex, k31ex, Pa, Pb, Pc] * k21ftl[k21ex, k31ex, Pa, Pb, Pc] *
  LCzr[R1, R2, DELTAO, WB, WC, w1, Pa, Pb, Pc, k21ex, k31ex];
Xmatr[R1_, R2_, DELTAO_, WB_, WC_, w1_, Pa_, Pb_, Pc_, k21ex_, k31ex_] :=
  LBzr[R1, R2, DELTAO, WB, WC, w1, Pa, Pb, Pc, k21ex, k31ex].
  LAzr[R1, R2, DELTAO, WB, WC, w1, Pa, Pb, Pc, k21ex, k31ex] +
  LAzr[R1, R2, DELTAO, WB, WC, w1, Pa, Pb, Pc, k21ex, k31ex].
  LCzr[R1, R2, DELTAO, WB, WC, w1, Pa, Pb, Pc, k21ex, k31ex] +
  LBzr[R1, R2, DELTAO, WB, WC, w1, Pa, Pb, Pc, k21ex, k31ex].
  LCzr[R1, R2, DELTAO, WB, WC, w1, Pa, Pb, Pc, k21ex, k31ex] -
  ((k12ftl[k21ex, k31ex, Pa, Pb, Pc] * k21ftl[k21ex, k31ex, Pa, Pb, Pc] +
    k13ftl[k21ex, k31ex, Pa, Pb, Pc] * k31ftl[k21ex, k31ex, Pa, Pb, Pc]) * I3);
Ymatr[R1_, R2_, DELTAO_, WB_, WC_, w1_, Pa_, Pb_, Pc_, k21ex_, k31ex_] :=
  LBzr[R1, R2, DELTAO, WB, WC, w1, Pa, Pb, Pc, k21ex, k31ex] +
  LAzr[R1, R2, DELTAO, WB, WC, w1, Pa, Pb, Pc, k21ex, k31ex] +
  LCzr[R1, R2, DELTAO, WB, WC, w1, Pa, Pb, Pc, k21ex, k31ex];

```

Out[857]/MatrixForm=

$$\begin{pmatrix} -R2 & -\text{DELTAO}_+ + \text{Pb}_- \text{WB}_- + \text{Pc}_- \text{WC}_- & 0 \\ \text{DELTAO}_- - \text{Pb}_- \text{WB}_- - \text{Pc}_- \text{WC}_- & -R2 & -w1_- \\ 0 & w1_- & -R1 \end{pmatrix}$$

Out[858]/MatrixForm=

$$\begin{pmatrix} -R2 & -\text{DELTAO}_- - \text{WB}_- + \text{Pb}_- \text{WB}_- + \text{Pc}_- \text{WC}_- & 0 \\ \text{DELTAO}_+ + \text{WB}_- - \text{Pb}_- \text{WB}_- - \text{Pc}_- \text{WC}_- & -R2 & -w1_- \\ 0 & w1_- & -R1 \end{pmatrix}$$

Out[859]/MatrixForm=

$$\begin{pmatrix} -R2 & -\text{DELTAO}_+ + \text{Pb}_- \text{WB}_- - \text{WC}_- + \text{Pc}_- \text{WC}_- & 0 \\ \text{DELTAO}_- - \text{Pb}_- \text{WB}_- + \text{WC}_- - \text{Pc}_- \text{WC}_- & -R2 & -w1_- \\ 0 & w1_- & -R1 \end{pmatrix}$$

The first (**R1rhothreelinearexactr**) of the following four equations gives the numerical solution by calculating the least negative of the 9 eigenvalues of the  $9 \times 9$   $L+R+K$  matrix.

**R1rhothreelinearsecondorderReffLRK** calculates the second order approximation similar to **Rex** from Eqs. 40 and 29, but replacing  $L'$  with  $L'+R$ .

**R1rhothreelinearsecondorderReffCosSin** is Eq. 14; **R1rhothreelinearsecondorderReffTrunc** is Eq. 10.

```

In[866]= R1rhothreelinearexactr[R1_, R2_, DELTAO_,
  WB_, WC_, w1_, k21ex_, k31ex_, k32ex_, Pa_, Pb_, Pc_] :=
-N[Re[Eigenvalues[Klinear[k21ex, k31ex, k32ex, Pa, Pb, Pc] + BigLtrr[R1,
  R2, DELTAO - Pb * WB - Pc * WC, WB + (DELTAO - Pb * WB - Pc * WC),
  WC + (DELTAO - Pb * WB - Pc * WC), w1]]]]][[9]]
R1rhothreelinearsecondorderReffLRK[R1_, R2_, DELTAO_, WB_, WC_,
  w1_, k21ex_, k31ex_, k32ex_, Pa_, Pb_, Pc_] :=
- (1 / (Tr[Inverse[Zmatr[R1, R2, DELTAO, WB, WC, w1, Pa, Pb, Pc, k21ex, k31ex]]].
  Xmatr[R1, R2, DELTAO, WB, WC, w1, Pa, Pb, Pc, k21ex, k31ex]] -
  Tr[Inverse[Zmatr[R1, R2, DELTAO, WB, WC, w1, Pa, Pb, Pc, k21ex, k31ex]]].
  Ymatr[R1, R2, DELTAO, WB, WC, w1, Pa, Pb, Pc, k21ex, k31ex] +
  Minors[Inverse[Zmatr[R1, R2, DELTAO, WB, WC, w1, Pa, Pb, Pc, k21ex, k31ex]]].
  Xmatr[R1, R2, DELTAO, WB, WC, w1, Pa, Pb, Pc, k21ex, k31ex]]] /
  Tr[Inverse[Zmatr[R1, R2, DELTAO, WB, WC, w1, Pa, Pb, Pc, k21ex, k31ex]]].
  Xmatr[R1, R2, DELTAO, WB, WC, w1, Pa, Pb, Pc, k21ex, k31ex]]));
R1rhothreelinearsecondorderReffCosSin[R1_, R2_, DELTAO_, WB_, WC_,
  w1_, k21ex_, k31ex_, k32ex_, Pa_, Pb_, Pc_] :=
R1 * cossq[DELTAO, WB, WC, w1, Pa, Pb, Pc] + R2 * sinsq[DELTAO, WB, WC, w1, Pa, Pb, Pc] +
- (1 / (Tr[Inverse[Zmat[DELTAO, WB, WC, w1, Pa, Pb, Pc, k21ex, k31ex]]].
  Xmat[DELTAO, WB, WC, w1, Pa, Pb, Pc, k21ex, k31ex]] -
  Tr[Inverse[Zmat[DELTAO, WB, WC, w1, Pa, Pb, Pc, k21ex, k31ex]]].
  Ymat[DELTAO, WB, WC, w1, Pa, Pb, Pc, k21ex, k31ex] +
  Minors[Inverse[Zmat[DELTAO, WB, WC, w1, Pa, Pb, Pc, k21ex, k31ex]]].
  Xmat[DELTAO, WB, WC, w1, Pa, Pb, Pc, k21ex, k31ex]]] /
  Tr[Inverse[Zmat[DELTAO, WB, WC, w1, Pa, Pb, Pc, k21ex, k31ex]]].
  Xmat[DELTAO, WB, WC, w1, Pa, Pb, Pc, k21ex, k31ex]]));
R1rhothreelinearsecondorderReffTrunc[R1_, R2_, DELTAO_, WB_, WC_,
  w1_, k21ex_, k31ex_, k32ex_, Pa_, Pb_, Pc_] :=
R2 - ((Tr[Inverse[BigLtr[DELTAO - Pb * WB - Pc * WC, WB + (DELTAO - Pb * WB - Pc * WC),
  WC + (DELTAO - Pb * WB - Pc * WC), w1] +
  Klinear[k21ex, k31ex, k32ex, Pa, Pb, Pc]].BigDRr[R1, R2]]) /
  Tr[Inverse[BigLtr[DELTAO - Pb * WB - Pc * WC, WB + (DELTAO - Pb * WB - Pc * WC), WC +
  (DELTAO - Pb * WB - Pc * WC), w1] + Klinear[k21ex, k31ex, k32ex, Pa, Pb, Pc]]]) +
- (1 / (Tr[Inverse[Zmat[DELTAO, WB, WC, w1, Pa, Pb, Pc, k21ex, k31ex]]].
  Xmat[DELTAO, WB, WC, w1, Pa, Pb, Pc, k21ex, k31ex]] -
  Tr[Inverse[Zmat[DELTAO, WB, WC, w1, Pa, Pb, Pc, k21ex, k31ex]]].
  Ymat[DELTAO, WB, WC, w1, Pa, Pb, Pc, k21ex, k31ex] +
  Minors[Inverse[Zmat[DELTAO, WB, WC, w1, Pa, Pb, Pc, k21ex, k31ex]]].
  Xmat[DELTAO, WB, WC, w1, Pa, Pb, Pc, k21ex, k31ex]]] /
  Tr[Inverse[Zmat[DELTAO, WB, WC, w1, Pa, Pb, Pc, k21ex, k31ex]]].
  Xmat[DELTAO, WB, WC, w1, Pa, Pb, Pc, k21ex, k31ex]]))

```

The following sections plot Figures S5, S3, S2, 5, S5(right panel), 3, S4. Refer to paper for details.  
Note that naming of exchange rate constants and states for Fig. 5 is different from the figure caption (but equivalent);  
it is more convenient for the calculation to always define  $k_{32}$  to be the non-linear fragment.

```

In[870]:= WBx = -1000; WCx = 2000; w1x = 500;
k21exx = 50; k31exx = 2000; k32exx = 700;
Pax = 0.85; Pbx = 0.1; Pcx = 0.05;
range1 = -3000; range2 = 2000; rb1 = 0; rb2 = 190
Plot[{threetriangularexact[x, WBx, WCx, w1x, k21exx, k31exx, k32exx, Pax, Pbx, Pcx],
  threelinearfirstorder[x, WBx, WCx, w1x, k21exx, k31exx, k32exx, Pax, Pbx, Pcx] *
    (1 / (1 + ZWoodbury[x, WBx, WCx, w1x, k21exx, k31exx, k32exx, Pax, Pbx, Pcx] *
      threelinearfirstorder[x, WBx, WCx, w1x, k21exx, k31exx, k32exx,
        Pax, Pbx, Pcx] * sinsq[x, WBx, WCx, w1x, Pax, Pbx, Pcx]))),
  threelinearsecondorder[x, WBx, WCx, w1x, k21exx, k31exx, k32exx, Pax, Pbx, Pcx] *
    (1 / (1 + ZWoodbury[x, WBx, WCx, w1x, k21exx, k31exx, k32exx, Pax, Pbx, Pcx] *
      threelinearfirstorder[x, WBx, WCx, w1x, k21exx, k31exx, k32exx,
        Pax, Pbx, Pcx] * sinsq[x, WBx, WCx, w1x, Pax, Pbx, Pcx]))),
  threelinearsecondorder[x, WBx, WCx, w1x, k21exx, k31exx, k32exx, Pax, Pbx, Pcx] *
    (1 / (1 + ZWoodbury[x, WBx, WCx, w1x, k21exx, k31exx, k32exx, Pax, Pbx, Pcx] *
      threelinearsecondorder[x, WBx, WCx, w1x, k21exx, k31exx, k32exx,
        Pax, Pbx, Pcx] * sinsq[x, WBx, WCx, w1x, Pax, Pbx, Pcx]))}],
{x, range1, range2}, GridLines -> None, FrameLabel ->
  {" $\Delta\Omega$  /s-1", "Rex /s-1"},
PlotRange -> {{range1, range2}, {rb1, rb2}},
Axes -> None,
BaseStyle ->
  {FontSize -> 13},
Frame -> True, PlotTheme -> "Monochrome",
PlotLegends ->
  {"triangular numerical", "triangular first order",
    "triangular Woodbury", "triangular_all_second_order_Woodbury"}]

```

Out[873]= 190

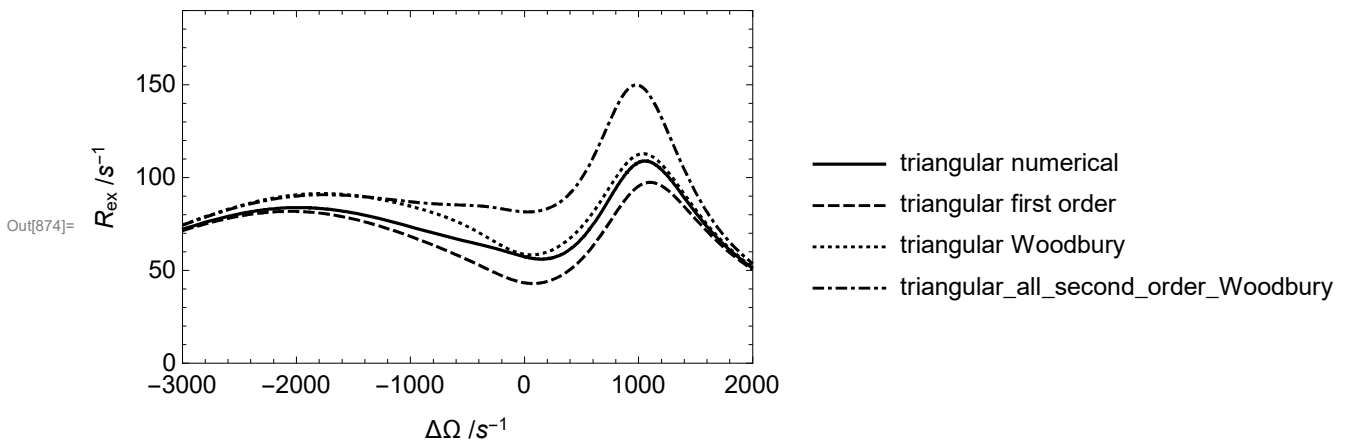

```

In[875]:= WBx = 1500; WCx = -3500; w1x = 500;
k21exx = 200; k31exx = 5000; k32exx = 0;
Pax = 0.95; Pbx = 0.035; Pcx = 0.015;
range1 = -5000; range2 = 5000; rb1 = 0; rb2 = 80
Plot[{threelinearexact[x, WBx, WCx, w1x, k21exx, k31exx, k32exx, Pax, Pbx, Pcx],
      threelinearfirstorder[x, WBx, WCx, w1x, k21exx, k31exx, k32exx, Pax, Pbx, Pcx],
      threelinearsecondorder[x, WBx, WCx, w1x, k21exx, k31exx, k32exx, Pax, Pbx, Pcx]},
      {x, range1, range2}, GridLines -> None, FrameLabel -> {" $\Delta\Omega$  /s-1", " $R_{ex}$  /s-1"},
      PlotRange -> Full, Axes -> None, BaseStyle -> {FontSize -> 13}, Frame -> True,
      PlotTheme -> "Monochrome", PlotLegends -> {"numerical", "firstorder", "secondorder"}]

```

Out[878]= 80

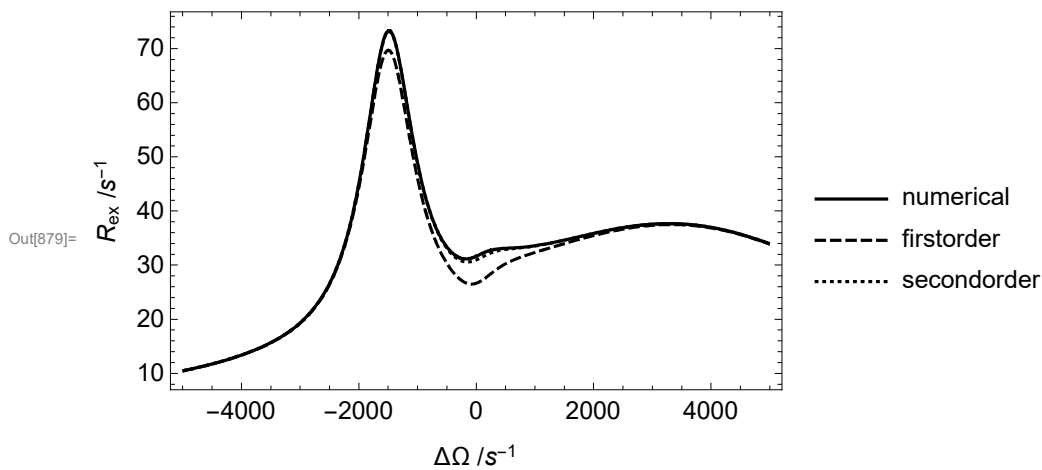

```

In[880]:= WBx = 750; WCx = -1500; w1x = 1250;
k21exx = 1550; k31exx = 2500; k32exx = 0;
Pax = 0.85; Pbx = 0.1; Pcx = 0.05;
range1 = -5000
range2 = 5000
rb1 = 0
rb2 = 80
Plot[{threelinearexact[x, WBx, WCx, w1x, k21exx, k31exx, k32exx, Pax, Pbx, Pcx],
threelinearfirstorder[x, WBx, WCx, w1x, k21exx, k31exx, k32exx, Pax, Pbx, Pcx],
threelinearsecondorder[x, WBx, WCx, w1x, k21exx, k31exx, k32exx, Pax, Pbx, Pcx]},
{x, range1, range2}, GridLines → None, FrameLabel → {" $\Delta\Omega$  /s-1", " $R_{ex}$  /s-1"},
PlotRange → Full, Axes → None, BaseStyle → {FontSize → 13}, Frame → True,
PlotTheme → "Monochrome", PlotLegends → {"numeral", "firstorder", "secondorder"}]

```

Out[883]= -5000

Out[884]= 5000

Out[885]= 0

Out[886]= 80

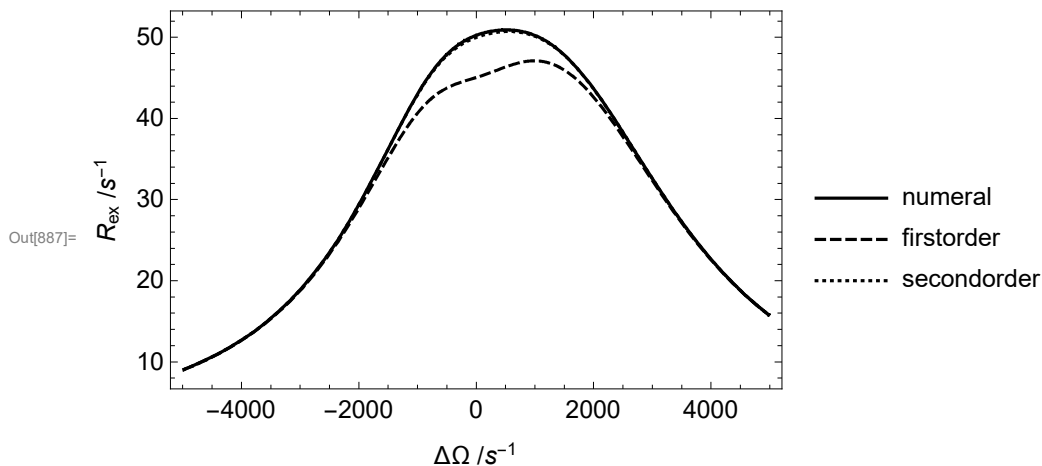

```

In[888]:= WBx = 4250; WCx = -4250; w1x = 350;
k21exx = 500; k31exx = 50; k32exx = 20;
Pax = 0.90; Pbx = 0.05; Pcx = 0.05;
range1 = -7000
range2 = 7000
rb1 = 0
rb2 = 1700
Plot[{threetriangularexact[x, WBx, WCx, w1x, k21exx, k31exx, k32exx, Pax, Pbx, Pcx],
threetriangularfirstorder[x, WBx, WCx, w1x, k21exx, k31exx, k32exx, Pax, Pbx, Pcx],
threelinearsecondorder[x, WBx, WCx, w1x, k21exx, k31exx, k32exx, Pax, Pbx, Pcx] *
(1 / (1 + ZWoodbury[x, WBx, WCx, w1x, k21exx, k31exx, k32exx, Pax, Pbx, Pcx] *

```

```

    threelinearfirstorder[x, WBx, WCx, wlx, k21exx, k31exx, k32exx,
      Pax, Pbx, Pcx] * sinsq[x, WBx, WCx, wlx, Pax, Pbx, Pcx] ) } } ,
{x, range1, range2}, GridLines → None, FrameLabel → {" $\Delta\Omega$  /s-1", "Rex /s-1"},
PlotRange → {{range1, range2}, {rb1, rb2}},
Axes → None,
BaseStyle → {FontSize → 13},
Frame → True,
PlotTheme → "Monochrome",
PlotLegends → {"numerical", "firstorder", "Woodbury"}]
WBx = -4250; WCx = -8500; wlx = 350;
k21exx = 500; k31exx = 20; k32exx = 50;
Pax = 0.05; Pbx = 0.9; Pcx = 0.05;
range1 = -7000
range2 = 7000
rb1 = 0
rb2 = 1700
Plot[{threetriangularexact[x, WBx, WCx, wlx, k21exx, k31exx, k32exx, Pax, Pbx, Pcx] ,
  threetriangularfirstorder[x, WBx, WCx, wlx, k21exx, k31exx, k32exx, Pax, Pbx, Pcx] ,
  threelinearsecondorder[x, WBx, WCx, wlx, k21exx, k31exx, k32exx, Pax, Pbx, Pcx] *
    (1 / (1 + ZWoodbury[x, WBx, WCx, wlx, k21exx, k31exx, k32exx, Pax, Pbx, Pcx] *
      threelinearfirstorder[x, WBx, WCx, wlx, k21exx, k31exx, k32exx,
        Pax, Pbx, Pcx] * sinsq[x, WBx, WCx, wlx, Pax, Pbx, Pcx] ) ) } } ,
{x, range1, range2}, GridLines → None, FrameLabel → {" $\Delta\Omega$  /s-1", "Rex /s-1"},
PlotRange → {{range1, range2}, {rb1, rb2}},
Axes → None,
BaseStyle → {FontSize → 13},
Frame → True,
PlotTheme → "Monochrome",
PlotLegends → {"numerical", "firstorder", "Woodbury"}]
WBx = 8500; WCx = 4250; wlx = 350;
k31exx = 50; k21exx = 20; k32exx = 500;
Pax = 0.05; Pbx = 0.05; Pcx = 0.9;
range1 = -7000
range2 = 7000
rb1 = 0
rb2 = 1700
Plot[{threetriangularexact[x, WBx, WCx, wlx, k21exx, k31exx, k32exx, Pax, Pbx, Pcx] ,
  threetriangularfirstorder[x, WBx, WCx, wlx, k21exx, k31exx, k32exx, Pax, Pbx, Pcx] ,
  threelinearsecondorder[x, WBx, WCx, wlx, k21exx, k31exx, k32exx, Pax, Pbx, Pcx] *
    (1 / (1 + ZWoodbury[x, WBx, WCx, wlx, k21exx, k31exx, k32exx, Pax, Pbx, Pcx] *
      threelinearfirstorder[x, WBx, WCx, wlx, k21exx, k31exx, k32exx,
        Pax, Pbx, Pcx] * sinsq[x, WBx, WCx, wlx, Pax, Pbx, Pcx] ) ) } } ,
{x, range1, range2}, GridLines → None, FrameLabel → {" $\Delta\Omega$  /s-1", "Rex /s-1"},

```



```

PlotRange -> {{range1, range2}, {rb1, rb2}},
Axes -> None,
BaseStyle -> {FontSize -> 13},
Frame -> True,
PlotTheme -> "Monochrome",
PlotLegends -> {"numerical", "firstorder", "Woodbury"}]

```

Out[891]= -7000

Out[892]= 7000

Out[893]= 0

Out[894]= 1700

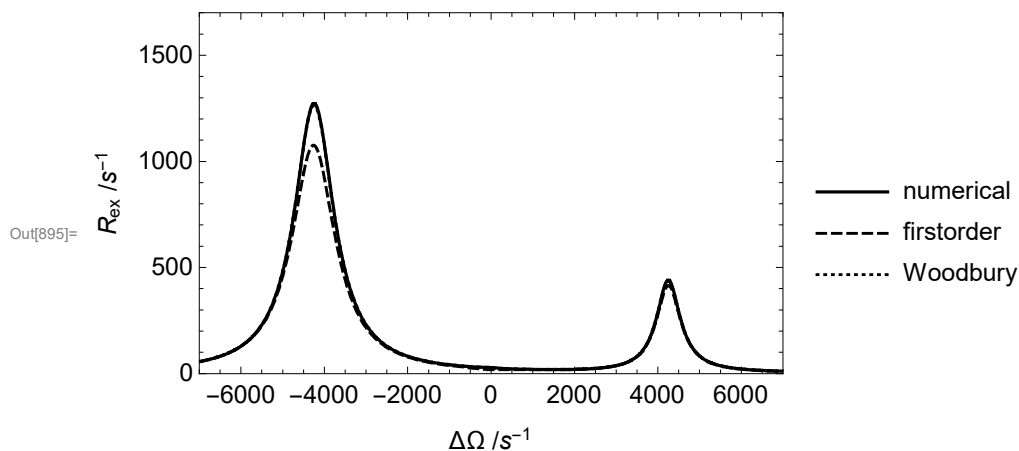

Out[899]= -7000

Out[900]= 7000

Out[901]= 0

Out[902]= 1700

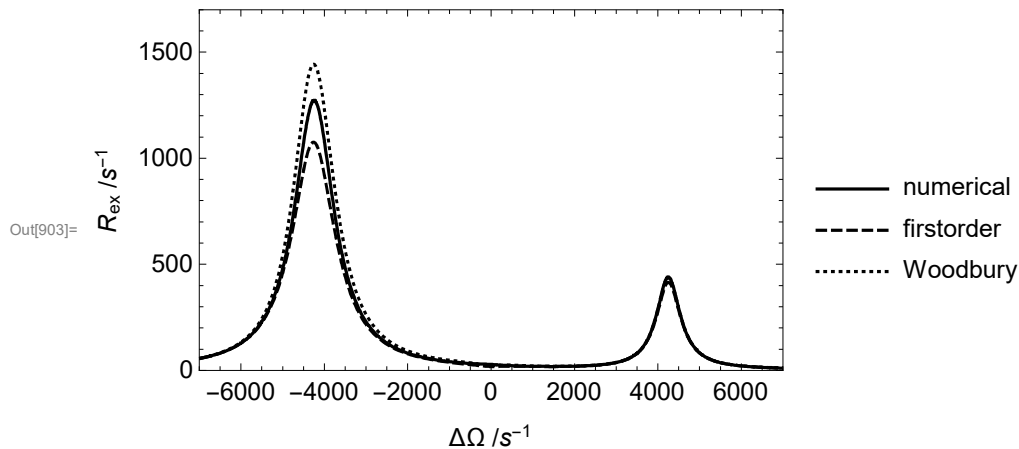

Out[907]= -7000

Out[908]= 7000

Out[909]= 0

Out[910]= 1700

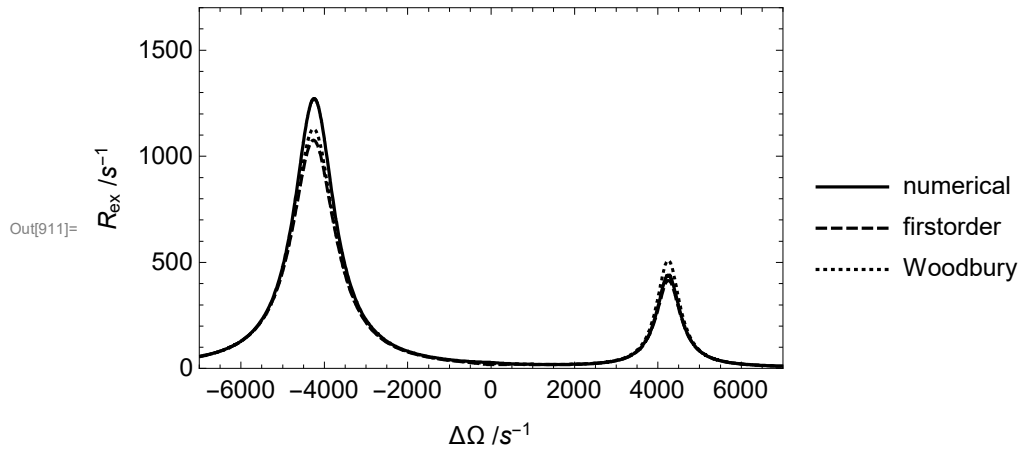

```

WBx = -1000; WCx = 2000; w1x = 500;
k21exx = 50; k31exx = 2000; k32exx = 1000;
Pax = 0.85; Pbx = 0.1; Pcx = 0.05;
range1 = -3000
range2 = 2000
rb1 = 0
rb2 = 300
Plot3D[
  {Abs[(threetriangularexact[x, WBx, WCx, w1x, k21exx, k31exx, y, Pax, Pbx, Pcx] -
    threelinearsecondorder[x, WBx, WCx, w1x, k21exx, k31exx, y, Pax, Pbx, Pcx] *
    (1/(1 + ZWoodbury[x, WBx, WCx, w1x, k21exx, k31exx, y, Pax, Pbx, Pcx] *
    threelinearfirstorder[x, WBx, WCx, w1x, k21exx, k31exx, y,
    Pax, Pbx, Pcx] * sinsq[x, WBx, WCx, w1x, Pax, Pbx, Pcx])))] -
  Abs[(threetriangularexact[x, WBx, WCx, w1x, k21exx, k31exx, y, Pax, Pbx, Pcx] -
    threelinearfirstorder[x, WBx, WCx, w1x, k21exx, k31exx, y, Pax, Pbx, Pcx] *
    (1/(1 + ZWoodbury[x, WBx, WCx, w1x, k21exx, k31exx, y, Pax, Pbx, Pcx] *
    threelinearfirstorder[x, WBx, WCx, w1x, k21exx, k31exx, y,
    Pax, Pbx, Pcx] * sinsq[x, WBx, WCx, w1x, Pax, Pbx, Pcx])))]}],
{x, range1, range2}, {y, 10, 2000}, PlotRange →
  All,
BaseStyle →
  {FontSize → 13},
AxesLabel →
  {" $\Delta\Omega$  /s-1",
  "    k32+k23 /s-1",
  "error /s-1"}, PlotLegends →
  {"error difference between exact-Woobury and exact-firstorder
  - smaller means larger first order approx error"}]
-3000
2000
0
300

```

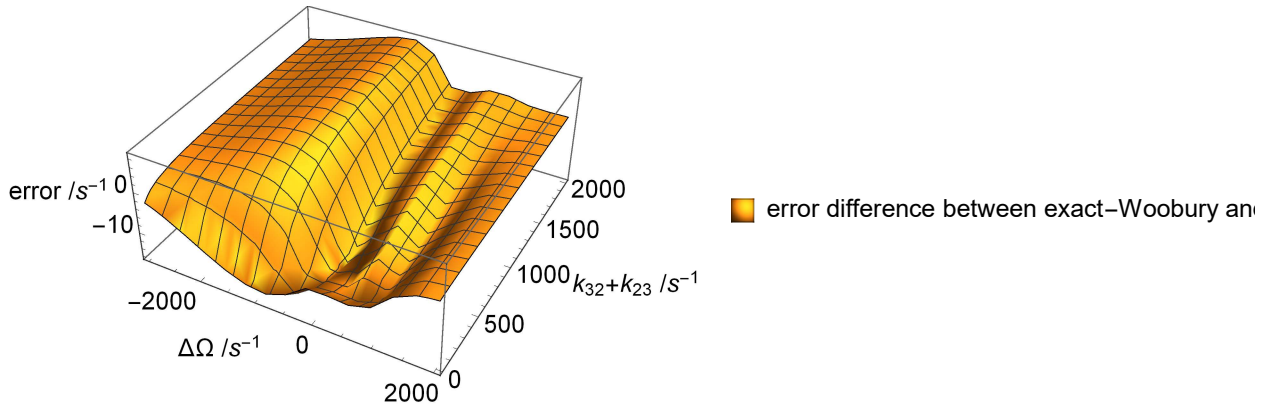

```

w1x = 50;
k21exx = 50;
k31exx = 100;
k32exx = 0
Pax = 0.52; Pbx = 0.32; Pcx = 0.16;
WBx = 200; WCx = -400;
Plot[{threelinearexact[x, WBx, WCx, w1x, k21exx, k31exx, k32exx, Pax, Pbx, Pcx],
      threelinearfirstorder[x, WBx, WCx, w1x, k21exx, k31exx, k32exx, Pax, Pbx, Pcx],
      threelinearsecondorder[x, WBx, WCx, w1x, k21exx, k31exx, k32exx, Pax, Pbx, Pcx]},
      {x, -1000, 1000}, FrameLabel -> {"ΔΩ /s⁻¹", "Rex /s⁻¹"}, GridLines -> None, Axes -> None,
      PlotRange -> Full, BaseStyle -> {FontSize -> 13}, Frame -> True, PlotTheme -> "Monochrome",
      PlotLegends -> {"numerical", "first order", "second order"}]
w1x = 50;
k21exx = 50;
k31exx = 100;
k32exx = 0
Pax = 0.7; Pbx = 0.20; Pcx = 0.10;
WBx = 200; WCx = -400;
Plot[{threelinearexact[x, WBx, WCx, w1x, k21exx, k31exx, k32exx, Pax, Pbx, Pcx],
      threelinearfirstorder[x, WBx, WCx, w1x, k21exx, k31exx, k32exx, Pax, Pbx, Pcx],
      threelinearsecondorder[x, WBx, WCx, w1x, k21exx, k31exx, k32exx, Pax, Pbx, Pcx]},
      {x, -1000, 1000}, FrameLabel -> {"ΔΩ /s⁻¹", "Rex /s⁻¹"}, GridLines -> None, Axes -> None,
      PlotRange -> Full, BaseStyle -> {FontSize -> 13}, Frame -> True, PlotTheme -> "Monochrome",
      PlotLegends -> {"numerical", "first order", "second order"}]
w1x = 50;
k21exx = 50;
k31exx = 100;
k32exx = 0
Pax = 0.85; Pbx = 0.10; Pcx = 0.05;
WBx = 200; WCx = -400;
Plot[{threelinearexact[x, WBx, WCx, w1x, k21exx, k31exx, k32exx, Pax, Pbx, Pcx],
      threelinearfirstorder[x, WBx, WCx, w1x, k21exx, k31exx, k32exx, Pax, Pbx, Pcx]},

```

```

threelinearsecondorder[x, WBx, WCx, wlx, k21exx, k31exx, k32exx, Pax, Pbx, Pcx]},
{x, -1000, 1000}, FrameLabel -> {"ΔΩ /s-1", "Rex /s-1"}, GridLines -> None, Axes -> None,
PlotRange -> Full, BaseStyle -> {FontSize -> 13}, Frame -> True, PlotTheme -> "Monochrome",
PlotLegends -> {"numerical", "first order", "second order"}]
w1x = 50;
k21exx = 50;
k31exx = 100;
k32exx = 0
Pax = 0.94; Pbx = 0.04; Pcx = 0.02;
WBx = 200; WCx = -400;
Plot[{threelinearexact[x, WBx, WCx, wlx, k21exx, k31exx, k32exx, Pax, Pbx, Pcx],
threelinearfirstorder[x, WBx, WCx, wlx, k21exx, k31exx, k32exx, Pax, Pbx, Pcx]},
threelinearsecondorder[x, WBx, WCx, wlx, k21exx, k31exx, k32exx, Pax, Pbx, Pcx]},
{x, -1000, 1000}, FrameLabel -> {"ΔΩ /s-1", "Rex /s-1"}, GridLines -> None, Axes -> None,
PlotRange -> Full, BaseStyle -> {FontSize -> 13}, Frame -> True, PlotTheme -> "Monochrome",
PlotLegends -> {"numerical", "first order", "second order"}]

```

0

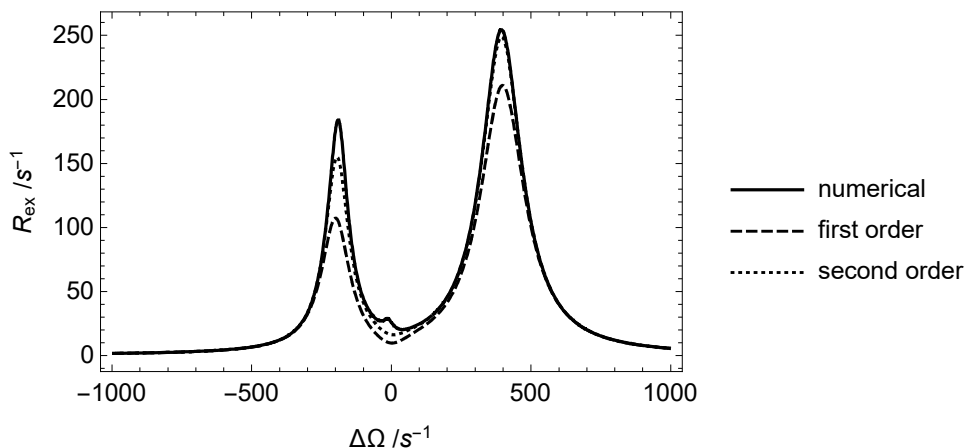

0

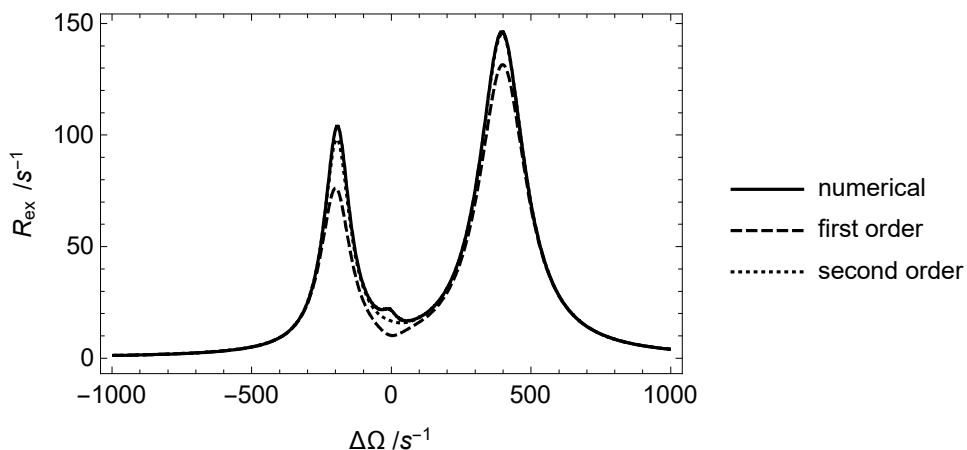

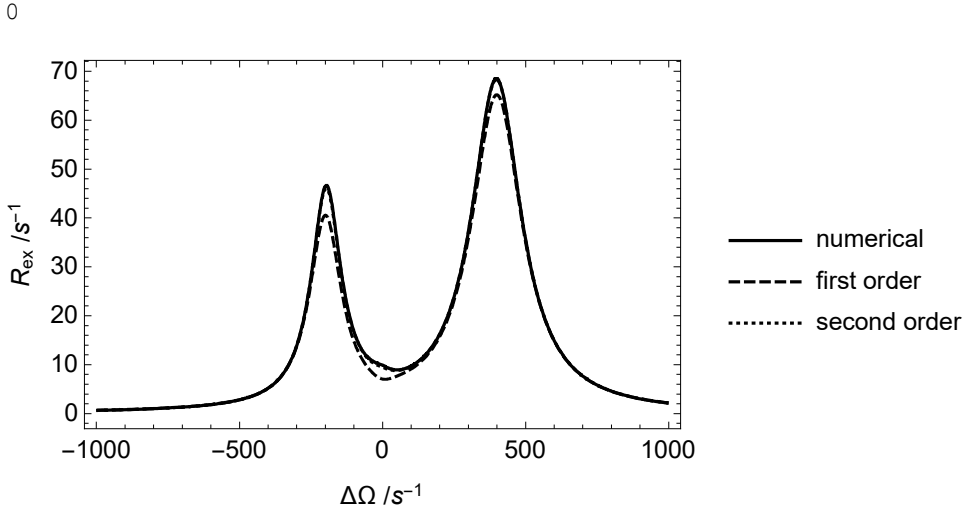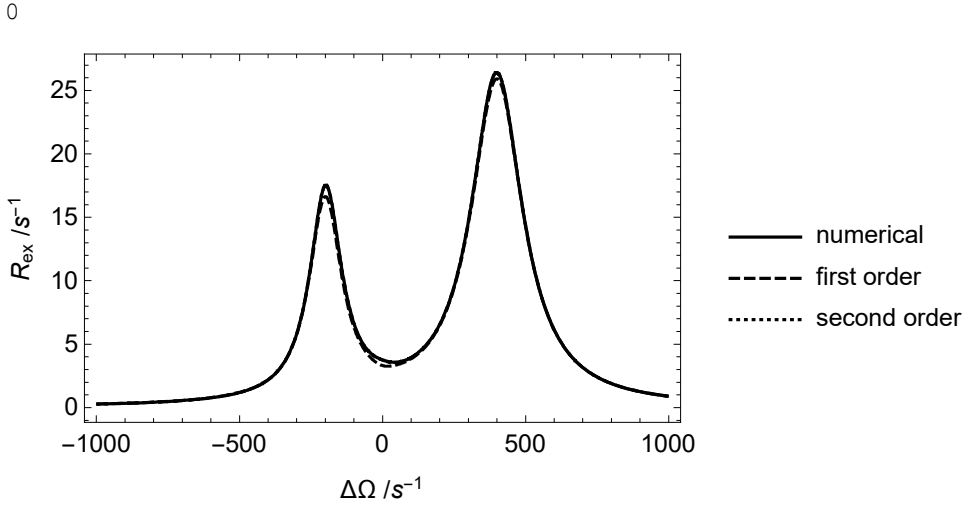

```

R1x = 1; R2x = 6;
w1x = 50;
k21exx = 100;
k31exx = 100;
k32exx = 0;
Pax = 0.3334; Pbx = 0.333; Pcx = 0.333;
WBx = 300; WCx = -300;
a = -600; b = 600;
Plot[
{uvw, Abs[R1rhothreelinearsecondorderReffCosSin[R1x, R2x, x, WBx, WCx, w1x, k21exx,
k31exx, k32exx, Pax, Pbx, Pcx] - R1rhothreelinearexactr[R1x,
R2x, x, WBx, WCx, w1x, k21exx, k31exx, k32exx, Pax, Pbx, Pcx]] ,
Abs[R1rhothreelinearsecondorderReffTrunc[R1x, R2x, x, WBx, WCx, w1x,
k21exx, k31exx, k32exx, Pax, Pbx, Pcx] - R1rhothreelinearexactr[
R1x, R2x, x, WBx, WCx, w1x, k21exx, k31exx, k32exx, Pax, Pbx, Pcx]]],

```

```

Abs[R1rhothreelinearsecondorderReffLRK[R1x, R2x, x, WBx, WCx, w1x,
  k21exx, k31exx, k32exx, Pax, Pbx, Pcx] - R1rhothreelinearexactr[
  R1x, R2x, x, WBx, WCx, w1x, k21exx, k31exx, k32exx, Pax, Pbx, Pcx]]],
{x, a, b}, FrameLabel → {" $\Delta\Omega$  /s-1", "R1ρ error /s-1"},
GridLines → None,
Axes → None,
PlotRange → Full,
BaseStyle → {FontSize → 13},
Frame → True, PlotTheme → "Monochrome",
PlotLegends →
  {"_", "second L+K simpl", "sec L+K ext", "second L+K+R", "sec L+K extAGP"}]
R1rhothreelinearexactr[x, 200, -400, 50, 50, 10, 0, 0.7, 0.2, 0.1]
Plot[{R1rhothreelinearexactr[R1x, R2x, x, WBx, WCx, w1x, k21exx,
  k31exx, k32exx, Pax, Pbx, Pcx], R1rhothreelinearsecondorderReffCosSin[
  R1x, R2x, x, WBx, WCx, w1x, k21exx, k31exx, k32exx, Pax, Pbx, Pcx],
  R1rhothreelinearsecondorderReffTrunc[R1x, R2x, x, WBx, WCx, w1x, k21exx,
  k31exx, k32exx, Pax, Pbx, Pcx], R1rhothreelinearsecondorderReffLRK[
  R1x, R2x, x, WBx, WCx, w1x, k21exx, k31exx, k32exx, Pax, Pbx, Pcx]}],
{x, a, b}, FrameLabel → {" $\Delta\Omega$  /s-1", "R1ρ /s-1"}, GridLines → None,
Axes → None, PlotRange → Full, BaseStyle → {FontSize → 13},
Frame → True, PlotTheme → "Monochrome", PlotLegends →
  {"num", "second L+K simpl", "sec L+K ext", "second L+K+R", "sec L+K extAGP"}]
a = 3
R1x = 1; R2x = 6;
w1x = 50;
k21exx = 100;
k31exx = 100;
k32exx = 0;
Pax = 0.9; Pbx = 0.05; Pcx = 0.05;
WBx = 300; WCx = -300;
a = -600; b = 600;
Plot[
  {uvw, Abs[R1rhothreelinearsecondorderReffCosSin[R1x, R2x, x, WBx, WCx, w1x, k21exx,
    k31exx, k32exx, Pax, Pbx, Pcx] - R1rhothreelinearexactr[R1x,
    R2x, x, WBx, WCx, w1x, k21exx, k31exx, k32exx, Pax, Pbx, Pcx]]],
  Abs[R1rhothreelinearsecondorderReffTrunc[R1x, R2x, x, WBx, WCx, w1x,
    k21exx, k31exx, k32exx, Pax, Pbx, Pcx] - R1rhothreelinearexactr[
    R1x, R2x, x, WBx, WCx, w1x, k21exx, k31exx, k32exx, Pax, Pbx, Pcx]]],
  Abs[R1rhothreelinearsecondorderReffLRK[R1x, R2x, x, WBx, WCx, w1x,
    k21exx, k31exx, k32exx, Pax, Pbx, Pcx] - R1rhothreelinearexactr[
    R1x, R2x, x, WBx, WCx, w1x, k21exx, k31exx, k32exx, Pax, Pbx, Pcx]]],
{x, a, b}, FrameLabel → {" $\Delta\Omega$  /s-1", "R1ρ error /s-1"},
GridLines → None,

```

```

Axes → None,
PlotRange → Full,
BaseStyle → {FontSize → 13},
Frame → True, PlotTheme → "Monochrome",
PlotLegends →
  {"_", "second L+K simpl", "sec L+K ext", "second L+K+R", "sec L+K extAGP"}]
R1rhothreelinearexactr[x, 200, -400, 50, 50, 10, 0, 0.7, 0.2, 0.1]
Plot[{R1rhothreelinearexactr[R1x, R2x, x, WBx, WCx, w1x, k21exx,
  k31exx, k32exx, Pax, Pbx, Pcx], R1rhothreelinearsecondorderReffCosSin[
  R1x, R2x, x, WBx, WCx, w1x, k21exx, k31exx, k32exx, Pax, Pbx, Pcx],
  R1rhothreelinearsecondorderReffTrunc[R1x, R2x, x, WBx, WCx, w1x, k21exx,
  k31exx, k32exx, Pax, Pbx, Pcx], R1rhothreelinearsecondorderReffLRK[
  R1x, R2x, x, WBx, WCx, w1x, k21exx, k31exx, k32exx, Pax, Pbx, Pcx]}],
{x, a, b}, FrameLabel → {" $\Delta\Omega$  /s-1", " $R_{1\rho}$  /s-1"}, GridLines → None,
Axes → None, PlotRange → Full, BaseStyle → {FontSize → 13},
Frame → True, PlotTheme → "Monochrome", PlotLegends →
  {"num", "second L+K simpl", "sec L+K ext", "second L+K+R", "sec L+K extAGP"}]

```

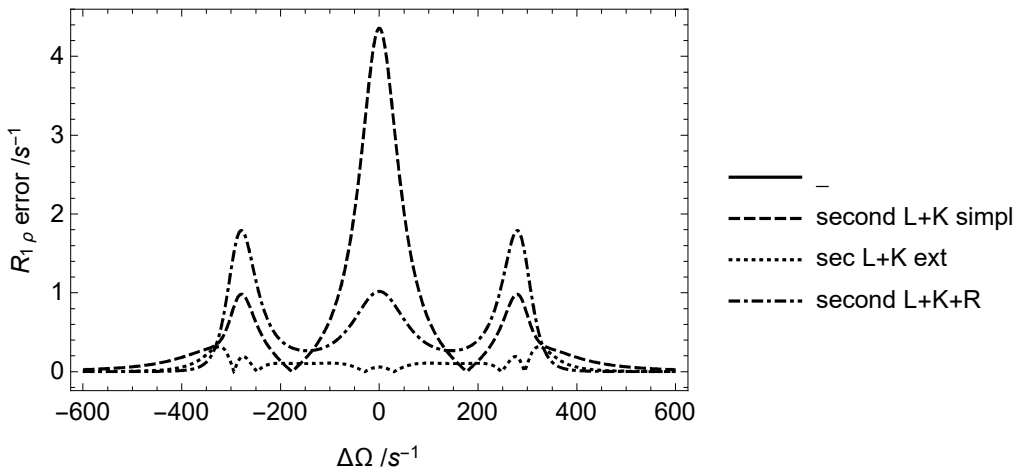

```

R1rhothreelinearexactr[x, 200, -400, 50, 50, 10, 0, 0.7, 0.2, 0.1]

```



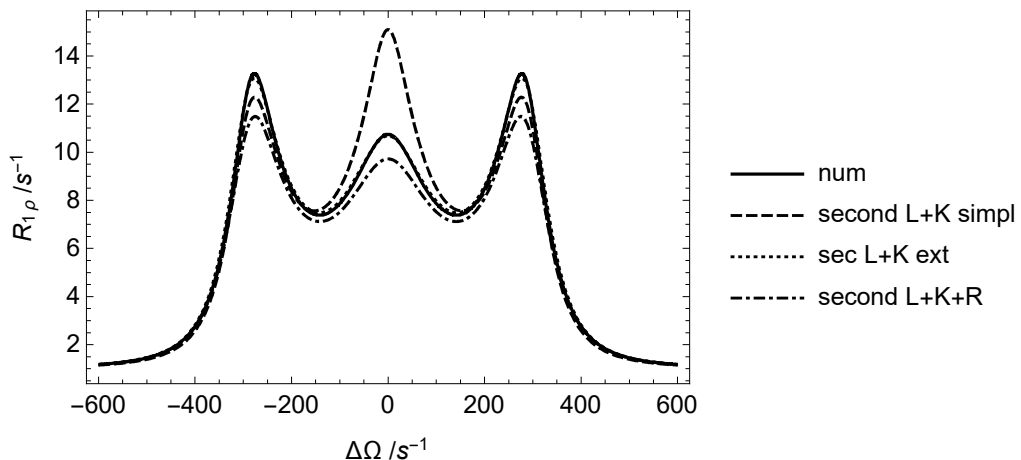

3

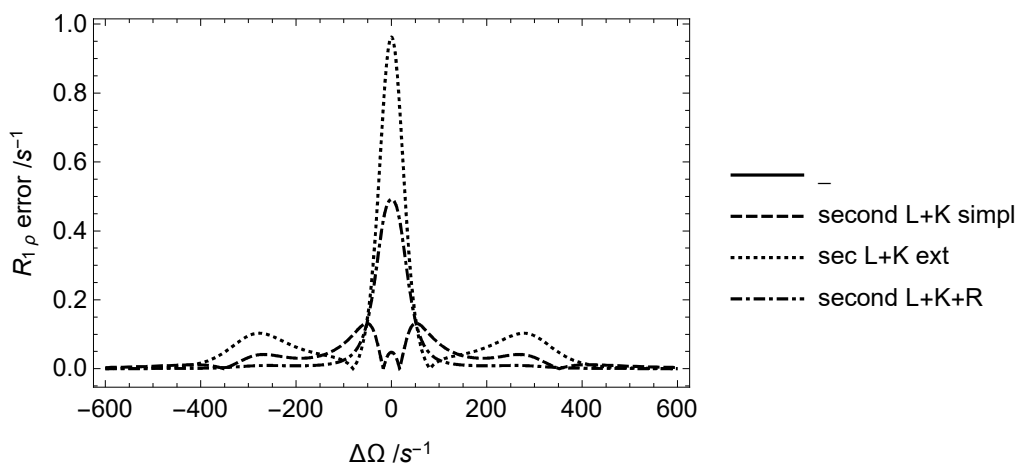

```
R1rhothreeexactr[x, 200, -400, 50, 50, 10, 0, 0.7, 0.2, 0.1]
```

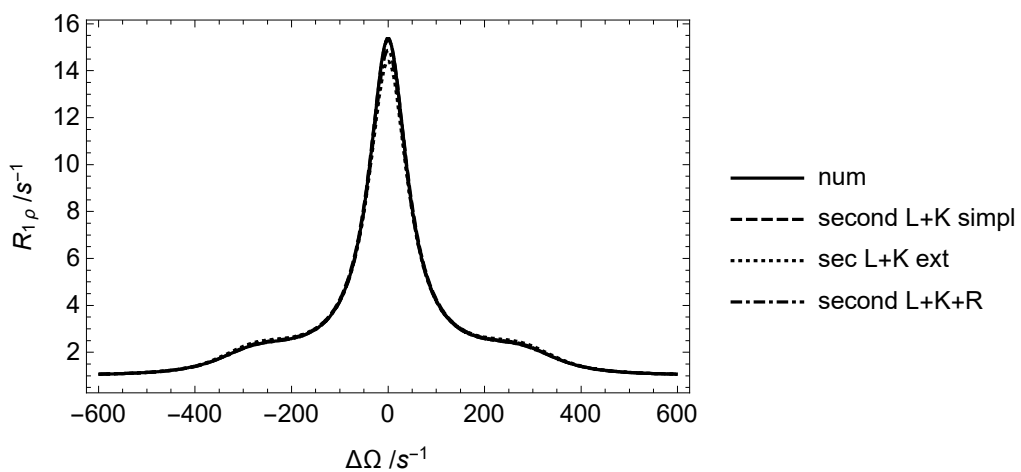

This is supplementary to Figure S4 - The contribution of the largest negative eigenvalue to the magnetization decay  $t = 0$  s and  $\Delta\Omega = 0$   $s^{-1}$  is here calculated to be 83%, mostly due the presence of negative complex eigenvalues (using Eq. 6, similar to Fig. S1).

ln[912]:=

```

thetax[WA_, WB_, WC_, w1_, Pa_, Pb_, Pc_] :=
  ArcSin[Sqrt[(w1^2) / (w1^2 + (Pa * WA + Pb * WB) ^ 2)]]
cossa[WA_, WB_, WC_, w1_, Pa_, Pb_, Pc_] := Pa * Cos[thetax[WA, WB, WC, w1, Pa, Pb, Pc]];
sinsa[WA_, WB_, WC_, w1_, Pa_, Pb_, Pc_] := Pa * Sin[thetax[WA, WB, WC, w1, Pa, Pb, Pc]];
cossb[WA_, WB_, WC_, w1_, Pa_, Pb_, Pc_] := Pb * Cos[thetax[WA, WB, WC, w1, Pa, Pb, Pc]];
sinsb[WA_, WB_, WC_, w1_, Pa_, Pb_, Pc_] := Pb * Sin[thetax[WA, WB, WC, w1, Pa, Pb, Pc]];
coss[WA_, WB_, WC_, w1_, Pa_, Pb_, Pc_] := Pc * Cos[thetax[WA, WB, WC, w1, Pa, Pb, Pc]];
sins[WA_, WB_, WC_, w1_, Pa_, Pb_, Pc_] := Pc * Sin[thetax[WA, WB, WC, w1, Pa, Pb, Pc]];
lamf[R1_, R2_, DELTAO_, WB_, WC_, w1_,
  k21ex_, k31ex_, k32ex_, Pa_, Pb_, Pc_] := Eigenvalues[
  (BigLtrr[R1, R2, DELTAO - Pb * WB - Pc * WC, WB + (DELTAO - Pb * WB - Pc * WC), WC +
    (DELTAO - Pb * WB - Pc * WC), w1] + Klinear[k21ex, k31ex, k32ex, Pa, Pb, Pc])] // N
uuf[R1_, R2_, DELTAO_, WB_, WC_, w1_, k21ex_, k31ex_, k32ex_, Pa_, Pb_, Pc_] :=
  Eigenvectors[
  (BigLtrr[R1, R2, DELTAO - Pb * WB - Pc * WC, WB + (DELTAO - Pb * WB - Pc * WC), WC +
    (DELTAO - Pb * WB - Pc * WC), w1] + Klinear[k21ex, k31ex, k32ex, Pa, Pb, Pc])] // N
m0f[R1_, R2_, DELTAO_, WB_, WC_, w1_, k21ex_, k31ex_, k32ex_, Pa_, Pb_, Pc_] :=
  {sinsa[DELTAO - Pb * WB - Pc * WC, WB + (DELTAO - Pb * WB - Pc * WC),
    WC + (DELTAO - Pb * WB - Pc * WC), w1, Pa, Pb, Pc], 0, cossa[DELTAO - Pb * WB - Pc * WC,
    WB + (DELTAO - Pb * WB - Pc * WC), WC + (DELTAO - Pb * WB - Pc * WC), w1, Pa, Pb, Pc],
  sinsb[DELTAO - Pb * WB - Pc * WC, WB + (DELTAO - Pb * WB - Pc * WC),
    WC + (DELTAO - Pb * WB - Pc * WC), w1, Pa, Pb, Pc], 0, cossb[DELTAO - Pb * WB - Pc * WC,
    WB + (DELTAO - Pb * WB - Pc * WC), WC + (DELTAO - Pb * WB - Pc * WC), w1, Pa, Pb, Pc],
  sinsc[DELTAO - Pb * WB - Pc * WC, WB + (DELTAO - Pb * WB - Pc * WC),
    WC + (DELTAO - Pb * WB - Pc * WC), w1, Pa, Pb, Pc], 0, coss[DELTAO - Pb * WB - Pc * WC,
    WB + (DELTAO - Pb * WB - Pc * WC), WC + (DELTAO - Pb * WB - Pc * WC), w1, Pa, Pb, Pc]} // N;
mdf[R1_, R2_, DELTAO_, WB_, WC_, w1_, k21ex_, k31ex_, k32ex_, Pa_, Pb_, Pc_] :=
  {Sin[thetax[DELTAO - Pb * WB - Pc * WC, WB + (DELTAO - Pb * WB - Pc * WC),
    WC + (DELTAO - Pb * WB - Pc * WC), w1, Pa, Pb, Pc]], 0,
  Cos[thetax[DELTAO - Pb * WB - Pc * WC, WB + (DELTAO - Pb * WB - Pc * WC),
    WC + (DELTAO - Pb * WB - Pc * WC), w1, Pa, Pb, Pc]],
  Sin[thetax[DELTAO - Pb * WB - Pc * WC, WB + (DELTAO - Pb * WB - Pc * WC),
    WC + (DELTAO - Pb * WB - Pc * WC), w1, Pa, Pb, Pc]], 0,
  Cos[thetax[DELTAO - Pb * WB - Pc * WC, WB + (DELTAO - Pb * WB - Pc * WC),
    WC + (DELTAO - Pb * WB - Pc * WC), w1, Pa, Pb, Pc]],
  Sin[thetax[DELTAO - Pb * WB - Pc * WC, WB + (DELTAO - Pb * WB - Pc * WC),
    WC + (DELTAO - Pb * WB - Pc * WC), w1, Pa, Pb, Pc]], 0,
  Cos[thetax[DELTAO - Pb * WB - Pc * WC, WB + (DELTAO - Pb * WB - Pc * WC),
    WC + (DELTAO - Pb * WB - Pc * WC), w1, Pa, Pb, Pc]]} // N;
umf[R1_, R2_, DELTAO_, WB_, WC_, w1_, k21ex_, k31ex_, k32ex_, Pa_, Pb_, Pc_] :=
  Inverse[uuf[R1, R2, DELTAO, WB, WC, w1, k21ex, k31ex, k32ex, Pa, Pb, Pc]]

```

```

ftsinglefx[xx_, lo_, R1_, R2_, DELTAO_, WB_, WC_,
  w1_, k21ex_, k31ex_, k32ex_, Pa_, Pb_, Pc_] :=
  Re[Sum[(uuf[R1, R2, DELTAO, WB, WC, w1, k21ex, k31ex, k32ex, Pa, Pb, Pc][[i]].
    mdf[R1, R2, DELTAO, WB, WC, w1, k21ex, k31ex, k32ex, Pa, Pb, Pc]) *
    (Transpose[umf[R1, R2, DELTAO, WB, WC, w1, k21ex, k31ex, k32ex, Pa, Pb, Pc]][[
      i]].mOf[R1, R2, DELTAO, WB, WC, w1, k21ex, k31ex, k32ex, Pa, Pb, Pc]) *
    Exp[lamf[R1, R2, DELTAO, WB, WC, w1, k21ex, k31ex, k32ex, Pa, Pb, Pc][[i]] xx],
    {i, lo, lo}] // N] *
  (Re[Sum[(uuf[R1, R2, DELTAO, WB, WC, w1, k21ex, k31ex, k32ex, Pa, Pb, Pc][[i]].
    mdf[R1, R2, DELTAO, WB, WC, w1, k21ex, k31ex, k32ex, Pa, Pb, Pc]) *
    (Transpose[umf[R1, R2, DELTAO, WB, WC, w1, k21ex, k31ex, k32ex, Pa, Pb, Pc]][[
      i]].mOf[R1, R2, DELTAO, WB, WC, w1, k21ex, k31ex, k32ex, Pa, Pb, Pc]) *
    Exp[lamf[R1, R2, DELTAO, WB, WC, w1, k21ex, k31ex, k32ex, Pa, Pb, Pc][[i]] 0],
    {i, lo, lo}] // N] / Abs[
  Re[Sum[(uuf[R1, R2, DELTAO, WB, WC, w1, k21ex, k31ex, k32ex, Pa, Pb, Pc][[i]].mdf[
    R1, R2, DELTAO, WB, WC, w1, k21ex, k31ex, k32ex, Pa, Pb, Pc]) * (Transpose[
    umf[R1, R2, DELTAO, WB, WC, w1, k21ex, k31ex, k32ex, Pa, Pb, Pc]][[i]].
    mOf[R1, R2, DELTAO, WB, WC, w1, k21ex, k31ex, k32ex, Pa, Pb, Pc]) *
    Exp[lamf[R1, R2, DELTAO, WB, WC, w1, k21ex, k31ex, k32ex, Pa, Pb, Pc][[i]] 0],
    {i, lo, lo}] // N]])

R1x =
  1;
R2x = 6;
w1x = 50;
k21exx = 100;
k31exx = 100;
k32exx = 0;
Pax = 0.33; Pbx = 0.33; Pcx = 0.34;
WBx = 300;
WCx = -300;
ftsinglefx[0, 1, R1x, R2x, 0, WBx, WCx, w1x, k21exx, k31exx, k32exx, Pax, Pbx, Pcx]
ftsinglefx[0, 2, R1x, R2x, 0, WBx, WCx, w1x, k21exx, k31exx, k32exx, Pax, Pbx, Pcx]
ftsinglefx[0, 3, R1x, R2x, 0, WBx, WCx, w1x, k21exx, k31exx, k32exx, Pax, Pbx, Pcx]
ftsinglefx[0, 4, R1x, R2x, 0, WBx, WCx, w1x, k21exx, k31exx, k32exx, Pax, Pbx, Pcx]
ftsinglefx[0, 5, R1x, R2x, 0, WBx, WCx, w1x, k21exx, k31exx, k32exx, Pax, Pbx, Pcx]
ftsinglefx[0, 6, R1x, R2x, 0, WBx, WCx, w1x, k21exx, k31exx, k32exx, Pax, Pbx, Pcx]
ftsinglefx[0, 7, R1x, R2x, 0, WBx, WCx, w1x, k21exx, k31exx, k32exx, Pax, Pbx, Pcx]
ftsinglefx[0, 8, R1x, R2x, 0, WBx, WCx, w1x, k21exx, k31exx, k32exx, Pax, Pbx, Pcx]
ftsinglefx[0, 9, R1x, R2x, 0, WBx, WCx, w1x, k21exx, k31exx, k32exx, Pax, Pbx, Pcx]
maxt = 0.2
axx = 0
Plot[
  {Total[Map[Function[r, ftsinglefx[t, r, R1x, R2x, axx, WBx, WCx, w1x, k21exx, k31exx,

```

```

      k32exx, Pax, Pbx, Pcx]], {1, 2}]]],
{t, 0, maxt}, PlotRange → Full, PlotTheme → "Monochrome",
FrameLabel → {"t /s", "a1·exp(-λ1t)+a2·exp(-λ2t)"},
GridLines → None, Axes → None,
BaseStyle → {FontSize → 13}, Frame → True]
Plot[Total[Map[Function[r, ftsinglefx[t, r, R1x, R2x, axx, WBx,
      WCx, wlx, k21exx, k31exx, k32exx, Pax, Pbx, Pcx]], {3, 4}]]],
{t, 0, maxt}, PlotRange → Full, PlotTheme → "Monochrome",
FrameLabel → {"t /s", "a3·exp(-λ3t)+a4·exp(-λ4t)"},
GridLines → None, Axes → None,
BaseStyle → {FontSize → 13}, Frame → True]
Plot[Total[Map[Function[r, ftsinglefx[t, r, R1x, R2x, axx, WBx,
      WCx, wlx, k21exx, k31exx, k32exx, Pax, Pbx, Pcx]], {5, 6}]]],
{t, 0, maxt}, PlotRange → Full, PlotTheme → "Monochrome",
FrameLabel → {"t /s", "a5·exp(-λ5t)+a6·exp(-λ6t)"},
GridLines → None, Axes → None,
BaseStyle → {FontSize → 13}, Frame → True]
Plot[Total[Map[Function[r, ftsinglefx[t, r, R1x, R2x, axx,
      WBx, WCx, wlx, k21exx, k31exx, k32exx, Pax, Pbx, Pcx]], {7}]]],
{t, 0, maxt}, PlotRange → Full, PlotTheme → "Monochrome",
FrameLabel → {"t /s", "a7·exp(-λ7t)"}, GridLines → None,
Axes → None, BaseStyle → {FontSize → 13}, Frame → True]
Plot[Total[Map[Function[r, ftsinglefx[t, r, R1x, R2x, axx,
      WBx, WCx, wlx, k21exx, k31exx, k32exx, Pax, Pbx, Pcx]], {8}]]],
{t, 0, maxt}, PlotRange → Full, PlotTheme → "Monochrome",
FrameLabel → {"t /s", "a8·exp(-λ8t)"}, GridLines → None,
Axes → None, BaseStyle → {FontSize → 13}, Frame → True]
Plot[Total[Map[Function[r, ftsinglefx[t, r, R1x, R2x, axx,
      WBx, WCx, wlx, k21exx, k31exx, k32exx, Pax, Pbx, Pcx]], {9}]]],
{t, 0, maxt}, PlotRange → Full, PlotTheme → "Monochrome",
FrameLabel → {"t /s", "a9·exp(-λ9t)"}, GridLines → None,
Axes → None, BaseStyle → {FontSize → 13}, Frame → True]

```

Out[926]= 0.0213355

Out[927]= 0.0213355

Out[928]= 0.0521936

Out[929]= 0.0521936

Out[930]= 0.018829

Out[931]= 0.018829

Out[932]= 0.046271

Out[933]= 0.0114974

Out[934]= 0.832831

Out[935]= 0.2

Out[936]= 0

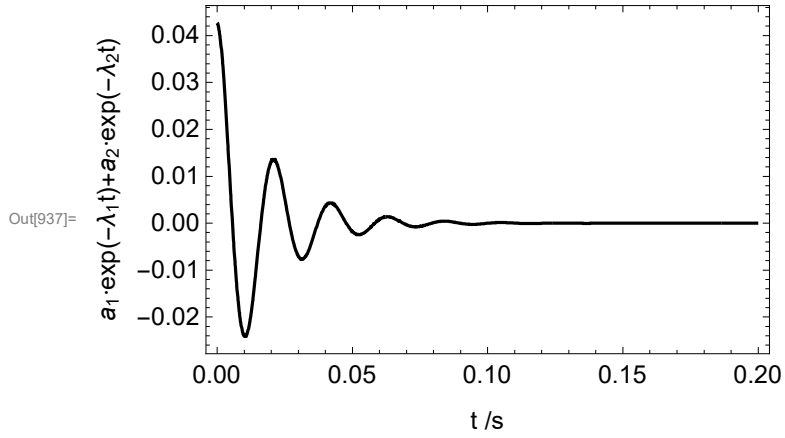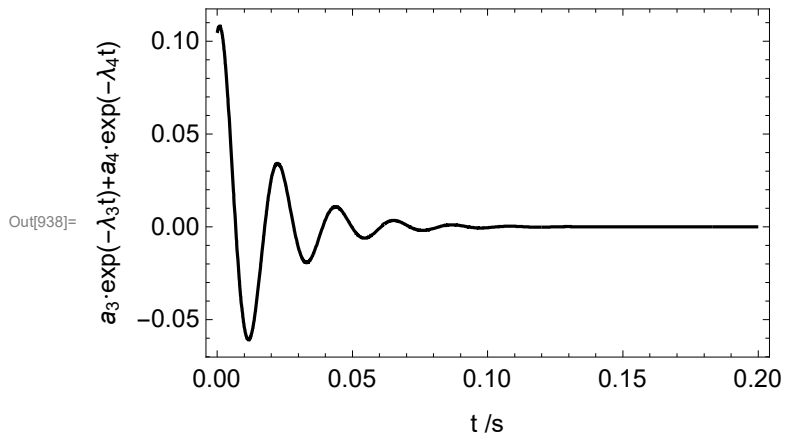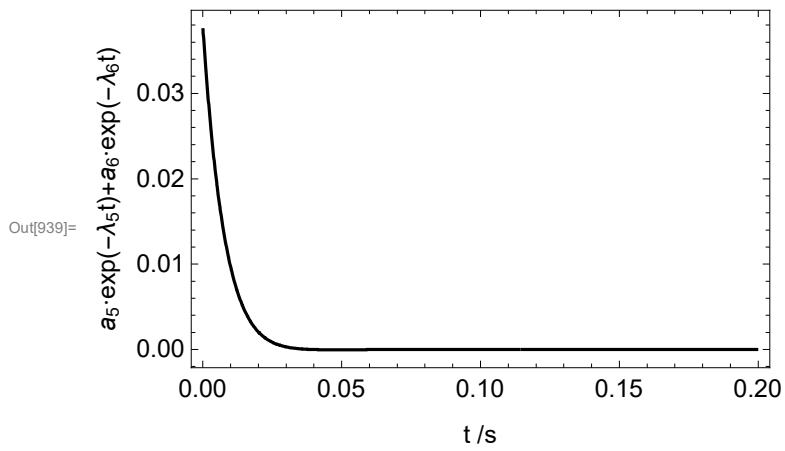

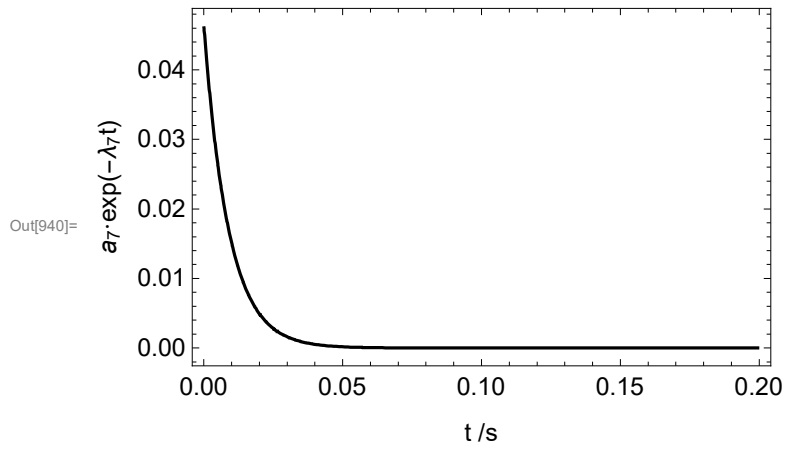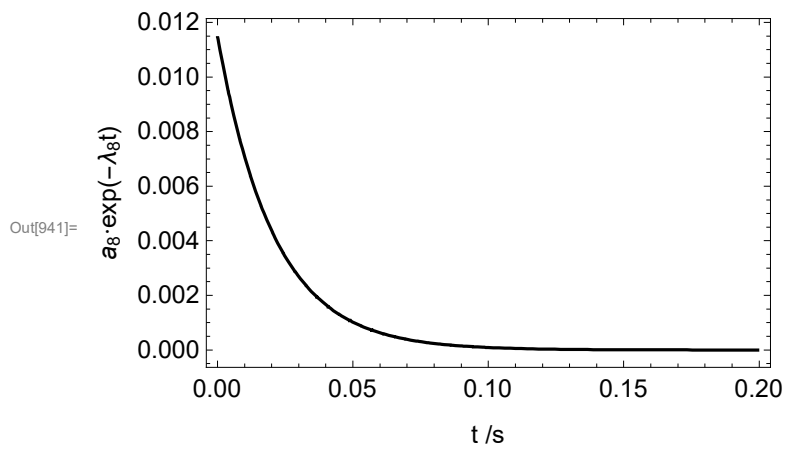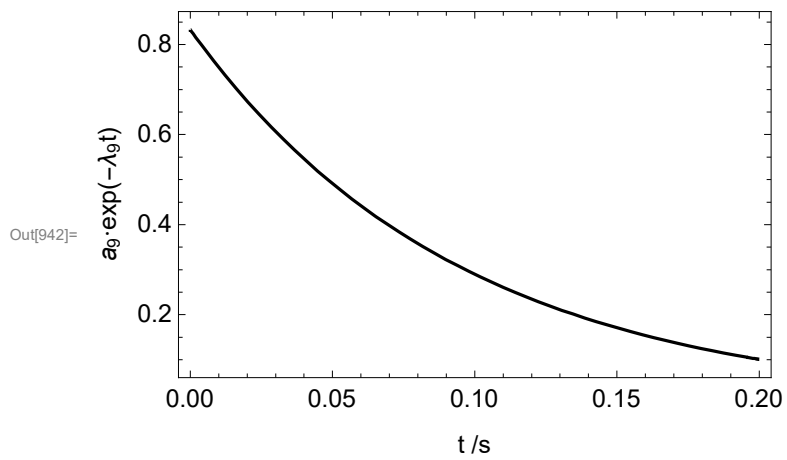

This defines some L, I, rate constants - note that  $k_{21ex} = k_{12ft} + k_{21ft}$  (and similar). Some rate constants differ only technically (using or not using dummy variables). Sinsq (theta) and the kinetic matrices for various four-site schemes are also defined in this block. There are also definitions for added L+K matrices.

```
In[943]:= Off[General::luc]
I3 = IdentityMatrix[3];
LA = {{0, -WA, 0}, {WA, 0, -w1}, {0, w1, 0}};
LB = {{0, -WB, 0}, {WB, 0, -w1}, {0, w1, 0}};
LC = {{0, -WC, 0}, {WC, 0, -w1}, {0, w1, 0}};
LD = {{0, -WD, 0}, {WD, 0, -w1}, {0, w1, 0}};
MatrixForm[LA];
MatrixForm[LB];
MatrixForm[LC];
MatrixForm[LD];
BigL[WA_, WB_, WC_, WD_, w1_] = ArrayFlatten[{{LA, 0 I3, 0 I3, 0 I3},
      {0 I3, LB, 0 I3, 0 I3}, {0 I3, 0 I3, LC, 0 I3}, {0 I3, 0 I3, 0 I3, LD}}];
MatrixForm[BigL[WA, WB, WC, WD, w1]];
k34f[k21ex_, k31ex_, k41ex_, k43ex_, Pa_, Pb_, Pc_, Pd_] = k43ex / (1 + Pc / Pd);
k14f[k21ex_, k31ex_, k41ex_, k43ex_, Pa_, Pb_, Pc_, Pd_] = k41ex / (1 + Pa / Pd);
k13f[k21ex_, k31ex_, k41ex_, k43ex_, Pa_, Pb_, Pc_, Pd_] = k31ex / (1 + Pa / Pc);
k12f[k21ex_, k31ex_, k41ex_, k43ex_, Pa_, Pb_, Pc_, Pd_] = k21ex / (1 + Pa / Pb);
k21f[k21ex_, k31ex_, k41ex_, k43ex_, Pa_, Pb_, Pc_, Pd_] = k21ex - k21ex / (1 + Pa / Pb);
k43f[k21ex_, k31ex_, k41ex_, k43ex_, Pa_, Pb_, Pc_, Pd_] = k43ex - k43ex / (1 + Pc / Pd);
k41f[k21ex_, k31ex_, k41ex_, k43ex_, Pa_, Pb_, Pc_, Pd_] = k41ex - k41ex / (1 + Pa / Pd);
k31f[k21ex_, k31ex_, k41ex_, k43ex_, Pa_, Pb_, Pc_, Pd_] = k31ex - k31ex / (1 + Pa / Pc);
k14fst[k21ex_, k31ex_, k41ex_, Pa_, Pb_, Pc_, Pd_] = k41ex / (1 + Pa / Pd);
k13fst[k21ex_, k31ex_, k41ex_, Pa_, Pb_, Pc_, Pd_] = k31ex / (1 + Pa / Pc);
k12fst[k21ex_, k31ex_, k41ex_, Pa_, Pb_, Pc_, Pd_] = k21ex / (1 + Pa / Pb);
k21fst[k21ex_, k31ex_, k41ex_, Pa_, Pb_, Pc_, Pd_] = k21ex - k21ex / (1 + Pa / Pb);
k41fst[k21ex_, k31ex_, k41ex_, Pa_, Pb_, Pc_, Pd_] = k41ex - k41ex / (1 + Pa / Pd);
k31fst[k21ex_, k31ex_, k41ex_, Pa_, Pb_, Pc_, Pd_] = k31ex - k31ex / (1 + Pa / Pc);
Kkitematrix[k21ex_, k31ex_, k41ex_, k43ex_, Pa_, Pb_, Pc_, Pd_] = ArrayFlatten[
  {{(-k12f[k21ex, k31ex, k41ex, k43ex, Pa, Pb, Pc, Pd] - k13f[k21ex, k31ex, k41ex,
    k43ex, Pa, Pb, Pc, Pd] - k14f[k21ex, k31ex, k41ex, k43ex, Pa, Pb, Pc, Pd]) I3,
    k21f[k21ex, k31ex, k41ex, k43ex, Pa, Pb, Pc, Pd] I3,
    k31f[k21ex, k31ex, k41ex, k43ex, Pa, Pb, Pc, Pd] I3,
    k41f[k21ex, k31ex, k41ex, k43ex, Pa, Pb, Pc, Pd] I3},
  {k12f[k21ex, k31ex, k41ex, k43ex, Pa, Pb, Pc, Pd] I3,
    -k21f[k21ex, k31ex, k41ex, k43ex, Pa, Pb, Pc, Pd] I3, 0 I3, 0 I3},
  {k13f[k21ex, k31ex, k41ex, k43ex, Pa, Pb, Pc, Pd] I3, 0 I3,
    (-k31f[k21ex, k31ex, k41ex, k43ex, Pa, Pb, Pc, Pd] -
    k34f[k21ex, k31ex, k41ex, k43ex, Pa, Pb, Pc, Pd]) I3,
    k43f[k21ex, k31ex, k41ex, k43ex, Pa, Pb, Pc, Pd] I3},
```

```

{k14f[k21ex, k31ex, k41ex, k43ex, Pa, Pb, Pc, Pd] I3, 0 I3,
 k34f[k21ex, k31ex, k41ex, k43ex, Pa, Pb, Pc, Pd] I3,
 (-k41f[k21ex, k31ex, k41ex, k43ex, Pa, Pb, Pc, Pd] -
  k43f[k21ex, k31ex, k41ex, k43ex, Pa, Pb, Pc, Pd]) I3}}];
MatrixForm[Kkitematrix[k21ex, k31ex, k41ex, k43ex, Pa, Pb, Pc, Pd]]
Kstarmatrix[k21ex_, k31ex_, k41ex_, Pa_, Pb_, Pc_, Pd_] =
ArrayFlatten[{{{(-k12fst[k21ex, k31ex, k41ex, Pa, Pb, Pc, Pd] - k13fst[k21ex, k31ex,
  k41ex, Pa, Pb, Pc, Pd] - k14fst[k21ex, k31ex, k41ex, Pa, Pb, Pc, Pd]) I3,
  k21fst[k21ex, k31ex, k41ex, Pa, Pb, Pc, Pd] I3, k31fst[k21ex, k31ex,
  k41ex, Pa, Pb, Pc, Pd] I3, k41fst[k21ex, k31ex, k41ex, Pa, Pb, Pc, Pd] I3},
{k12fst[k21ex, k31ex, k41ex, Pa, Pb, Pc, Pd] I3,
 -k21fst[k21ex, k31ex, k41ex, Pa, Pb, Pc, Pd] I3, 0 I3, 0 I3},
{k13fst[k21ex, k31ex, k41ex, Pa, Pb, Pc, Pd] I3, 0 I3,
 -k31fst[k21ex, k31ex, k41ex, Pa, Pb, Pc, Pd] I3, 0 I3},
{k14fst[k21ex, k31ex, k41ex, Pa, Pb, Pc, Pd] I3, 0 I3, 0 I3,
 -k41fst[k21ex, k31ex, k41ex, Pa, Pb, Pc, Pd] I3}}];
MatrixForm[Kstarmatrix[k21ex, k31ex, k41ex, Pa, Pb, Pc, Pd]]
Klinearmatrix[k21ex_, k31ex_, k41ex_, k43ex_, PVa_, PVb_, PVc_, PVd_] :=
ArrayFlatten[{{{(-k12f[k21ex, k31ex, k41ex, k43ex, PVa, PVb, PVc, PVd] -
  k13f[k21ex, k31ex, k41ex, k43ex, PVa, PVb, PVc, PVd]) I3,
  k21f[k21ex, k31ex, k41ex, k43ex, PVa, PVb, PVc, PVd] I3,
  k31f[k21ex, k31ex, k41ex, k43ex, PVa, PVb, PVc, PVd] I3, 0 I3},
{k12f[k21ex, k31ex, k41ex, k43ex, PVa, PVb, PVc, PVd] I3,
 -k21f[k21ex, k31ex, k41ex, k43ex, PVa, PVb, PVc, PVd] I3, 0 I3, 0 I3},
{k13f[k21ex, k31ex, k41ex, k43ex, PVa, PVb, PVc, PVd] I3, 0 I3,
 -(k34f[k21ex, k31ex, k41ex, k43ex, PVa, PVb, PVc, PVd] +
  k31f[k21ex, k31ex, k41ex, k43ex, PVa, PVb, PVc, PVd]) I3,
  k43f[k21ex, k31ex, k41ex, k43ex, PVa, PVb, PVc, PVd] I3},
{0 I3, 0 I3, k34f[k21ex, k31ex, k41ex, k43ex, PVa, PVb, PVc, PVd] I3,
 -k43f[k21ex, k31ex, k41ex, k43ex, PVa, PVb, PVc, PVd] I3}}];
MatrixForm[Klinearmatrix[k21ex, k31ex, k41ex, k43ex, PVa, PVb, PVc, PVd]]

sinsqtheta[DELTAO_, WB_, WC_, WD_, w1_, Pa_, Pb_, Pc_, Pd_] :=
(w1^2 / (w1^2 + ((DELTAO - Pb * WB - Pc * WC - Pd * WD) * Pa +
  (WB + (DELTAO - Pb * WB - Pc * WC - Pd * WD)) * Pb +
  (WC + (DELTAO - Pb * WB - Pc * WC - Pd * WD)) * Pc +
  (WD + (DELTAO - Pb * WB - Pc * WC - Pd * WD)) * Pd)^2));

kiteLK[DELTAO_, WB_, WC_, WD_, w1_, k21ex_, k31ex_, k41ex_, k43ex_, Pa_, Pb_, Pc_,
Pd_] := BigL[DELTAO - Pb * WB - Pc * WC - Pd * WD, WB + (DELTAO - Pb * WB - Pc * WC - Pd * WD),
WC + (DELTAO - Pb * WB - Pc * WC - Pd * WD), WD + (DELTAO - Pb * WB - Pc * WC - Pd * WD), w1] +
Kkitematrix[k21ex, k31ex, k41ex, k43ex, Pa, Pb, Pc, Pd];
linearLK[DELTAO_, WB_, WC_, WD_, w1_, k21ex_, k31ex_,

```



```

k41ex_, k43ex_, PVa_, PVb_, PVc_, Pvd_] :=
BigL[DELTAO - PVb * WB - PVc * WC - Pvd * WD, WB + (DELTAO - PVb * WB - PVc * WC - Pvd * WD),
WC + (DELTAO - PVb * WB - PVc * WC - Pvd * WD), WD + (DELTAO - PVb * WB - PVc * WC - Pvd * WD),
w1] + Klinearmatrix[k21ex, k31ex, k41ex, k43ex, PVa, PVb, PVc, Pvd];
starlk[DELTAO_, WB_, WC_, WD_, w1_, k21ex_, k31ex_, k41ex_, Pa_, Pb_, Pc_, Pd_] :=
BigL[DELTAO - Pb * WB - Pc * WC - Pd * WD, WB + (DELTAO - Pb * WB - Pc * WC - Pd * WD),
WC + (DELTAO - Pb * WB - Pc * WC - Pd * WD), WD + (DELTAO - Pb * WB - Pc * WC - Pd * WD), w1] +
Kstarmatrix[k21ex, k31ex, k41ex, Pa, Pb, Pc, Pd];

```

Out[970]/MatrixForm=

$$\begin{pmatrix}
 -\frac{k21ex}{1+\frac{Pa}{Pb}} - \frac{k31ex}{1+\frac{Pa}{Pc}} - \frac{k41ex}{1+\frac{Pa}{Pd}} & 0 & 0 & k21ex - \frac{k21ex}{1+\frac{Pa}{Pb}} & 0 \\
 0 & -\frac{k21ex}{1+\frac{Pa}{Pb}} - \frac{k31ex}{1+\frac{Pa}{Pc}} - \frac{k41ex}{1+\frac{Pa}{Pd}} & 0 & 0 & k21ex - \frac{k21ex}{1+\frac{Pa}{Pb}} \\
 0 & 0 & -\frac{k21ex}{1+\frac{Pa}{Pb}} - \frac{k31ex}{1+\frac{Pa}{Pc}} - \frac{k41ex}{1+\frac{Pa}{Pd}} & 0 & 0 \\
 \frac{k21ex}{1+\frac{Pa}{Pb}} & 0 & 0 & -k21ex + \frac{k21ex}{1+\frac{Pa}{Pb}} & 0 \\
 0 & \frac{k21ex}{1+\frac{Pa}{Pb}} & 0 & 0 & -k21ex + \frac{k21ex}{1+\frac{Pa}{Pb}} \\
 0 & 0 & \frac{k21ex}{1+\frac{Pa}{Pb}} & 0 & 0 \\
 \frac{k31ex}{1+\frac{Pa}{Pc}} & 0 & 0 & 0 & 0 \\
 0 & \frac{k31ex}{1+\frac{Pa}{Pc}} & 0 & 0 & 0 \\
 0 & 0 & \frac{k31ex}{1+\frac{Pa}{Pc}} & 0 & 0 \\
 \frac{k41ex}{1+\frac{Pa}{Pd}} & 0 & 0 & 0 & 0 \\
 0 & \frac{k41ex}{1+\frac{Pa}{Pd}} & 0 & 0 & 0 \\
 0 & 0 & \frac{k41ex}{1+\frac{Pa}{Pd}} & 0 & 0
 \end{pmatrix}$$

Out[972]/MatrixForm=

$$\begin{pmatrix} -\frac{k_{21ex}}{1+\frac{Pa}{Pb}} - \frac{k_{31ex}}{1+\frac{Pa}{Pc}} - \frac{k_{41ex}}{1+\frac{Pa}{Pd}} & 0 & 0 & k_{21ex} - \frac{k_{21ex}}{1+\frac{Pa}{Pb}} & 0 \\ 0 & -\frac{k_{21ex}}{1+\frac{Pa}{Pb}} - \frac{k_{31ex}}{1+\frac{Pa}{Pc}} - \frac{k_{41ex}}{1+\frac{Pa}{Pd}} & 0 & 0 & k_{21ex} - \frac{k_{21ex}}{1+\frac{Pa}{Pb}} \\ 0 & 0 & -\frac{k_{21ex}}{1+\frac{Pa}{Pb}} - \frac{k_{31ex}}{1+\frac{Pa}{Pc}} - \frac{k_{41ex}}{1+\frac{Pa}{Pd}} & 0 & 0 \\ \frac{k_{21ex}}{1+\frac{Pa}{Pb}} & 0 & 0 & -k_{21ex} + \frac{k_{21ex}}{1+\frac{Pa}{Pb}} & 0 \\ 0 & \frac{k_{21ex}}{1+\frac{Pa}{Pb}} & 0 & 0 & -k_{21ex} + \frac{k_{21ex}}{1+\frac{Pa}{Pb}} \\ 0 & 0 & \frac{k_{21ex}}{1+\frac{Pa}{Pb}} & 0 & 0 \\ \frac{k_{31ex}}{1+\frac{Pa}{Pc}} & 0 & 0 & 0 & 0 \\ 0 & \frac{k_{31ex}}{1+\frac{Pa}{Pc}} & 0 & 0 & 0 \\ 0 & 0 & \frac{k_{31ex}}{1+\frac{Pa}{Pc}} & 0 & 0 \\ \frac{k_{41ex}}{1+\frac{Pa}{Pd}} & 0 & 0 & 0 & 0 \\ 0 & \frac{k_{41ex}}{1+\frac{Pa}{Pd}} & 0 & 0 & 0 \\ 0 & 0 & \frac{k_{41ex}}{1+\frac{Pa}{Pd}} & 0 & 0 \end{pmatrix}$$

Out[974]/MatrixForm=

$$\begin{pmatrix} -\frac{k_{21ex}}{1+\frac{PVa}{PVB}} - \frac{k_{31ex}}{1+\frac{PVa}{PVC}} & 0 & 0 & k_{21ex} - \frac{k_{21ex}}{1+\frac{PVa}{PVB}} & 0 & 0 & k \\ 0 & -\frac{k_{21ex}}{1+\frac{PVa}{PVB}} - \frac{k_{31ex}}{1+\frac{PVa}{PVC}} & 0 & 0 & k_{21ex} - \frac{k_{21ex}}{1+\frac{PVa}{PVB}} & 0 & 0 \\ 0 & 0 & -\frac{k_{21ex}}{1+\frac{PVa}{PVB}} - \frac{k_{31ex}}{1+\frac{PVa}{PVC}} & 0 & 0 & k_{21ex} - \frac{k_{21ex}}{1+\frac{PVa}{PVB}} & 0 \\ \frac{k_{21ex}}{1+\frac{PVa}{PVB}} & 0 & 0 & -k_{21ex} + \frac{k_{21ex}}{1+\frac{PVa}{PVB}} & 0 & 0 & 0 \\ 0 & \frac{k_{21ex}}{1+\frac{PVa}{PVB}} & 0 & 0 & -k_{21ex} + \frac{k_{21ex}}{1+\frac{PVa}{PVB}} & 0 & 0 \\ 0 & 0 & \frac{k_{21ex}}{1+\frac{PVa}{PVB}} & 0 & 0 & -k_{21ex} + \frac{k_{21ex}}{1+\frac{PVa}{PVB}} & 0 \\ \frac{k_{31ex}}{1+\frac{PVa}{PVC}} & 0 & 0 & 0 & 0 & 0 & -k_{31ex} \\ 0 & \frac{k_{31ex}}{1+\frac{PVa}{PVC}} & 0 & 0 & 0 & 0 & 0 \\ 0 & 0 & \frac{k_{31ex}}{1+\frac{PVa}{PVC}} & 0 & 0 & 0 & 0 \\ 0 & 0 & 0 & 0 & 0 & 0 & 0 \\ 0 & 0 & 0 & 0 & 0 & 0 & 0 \\ 0 & 0 & 0 & 0 & 0 & 0 & 0 \end{pmatrix}$$

These are matrices and definitions needed to calculate the second-order approximation for the four-site scheme (Eqs. S1-S5, Eq 43).

In[979]:=  $LBx[DELTAO_, WB_, WC_, WD_, w1_, PVa_, PVb_, PVC_, PVd_] =$   
 $\{ \{0, - (DELTAO - PVb * WB - PVC * WC - PVd * WD), 0\},$   
 $\{ (DELTAO - PVb * WB - PVC * WC - PVd * WD), 0, -w1\}, \{0, w1, 0\} \}$   
 $LBx[DELTAO_, WB_, WC_, WD_, w1_, PVa_, PVb_, PVC_, PVd_] =$   
 $\{ \{0, - (WB + DELTAO - PVb * WB - PVC * WC - PVd * WD), 0\},$

```

{WB + DELTAO - PVb * WB - Pvc * WC - Pvd * WD, 0, -w1}, {0, w1, 0}
LCx[DELTAO_, WB_, WC_, WD_, w1_, PVa_, PVb_, Pvc_, Pvd_] =
  {{0, -(WC + DELTAO - PVb * WB - Pvc * WC - Pvd * WD), 0},
   {WC + DELTAO - PVb * WB - Pvc * WC - Pvd * WD, 0, -w1}, {0, w1, 0}}
LDx[DELTAO_, WB_, WC_, WD_, w1_, PVa_, PVb_, Pvc_, Pvd_] =
  {{0, -(WD + DELTAO - PVb * WB - Pvc * WC - Pvd * WD), 0},
   {WD + DELTAO - PVb * WB - Pvc * WC - Pvd * WD, 0, -w1}, {0, w1, 0}}
LAz[DELTAO_, WB_, WC_, WD_, w1_, PVa_, PVb_, Pvc_, Pvd_, k21ex_, k31ex_,
  k41ex_, k43ex_] := LAx[DELTAO, WB, WC, WD, w1, PVa, PVb, Pvc, Pvd] -
  (k12f[k21ex, k31ex, k41ex, k43ex, PVa, PVb, Pvc, Pvd] +
   k13f[k21ex, k31ex, k41ex, k43ex, PVa, PVb, Pvc, Pvd]) * I3;
LBz[DELTAO_, WB_, WC_, WD_, w1_, PVa_, PVb_, Pvc_, Pvd_, k21ex_, k31ex_,
  k41ex_, k43ex_] := LBx[DELTAO, WB, WC, WD, w1, PVa, PVb, Pvc, Pvd] -
  k21f[k21ex, k31ex, k41ex, k43ex, PVa, PVb, Pvc, Pvd] * I3;
LCz[DELTAO_, WB_, WC_, WD_, w1_, PVa_, PVb_, Pvc_, Pvd_, k21ex_, k31ex_,
  k41ex_, k43ex_] := LCx[DELTAO, WB, WC, WD, w1, PVa, PVb, Pvc, Pvd] -
  (k31f[k21ex, k31ex, k41ex, k43ex, PVa, PVb, Pvc, Pvd] +
   k34f[k21ex, k31ex, k41ex, k43ex, PVa, PVb, Pvc, Pvd]) * I3;
LDz[DELTAO_, WB_, WC_, WD_, w1_, PVa_, PVb_, Pvc_, Pvd_, k21ex_, k31ex_,
  k41ex_, k43ex_] := LDx[DELTAO, WB, WC, WD, w1, PVa, PVb, Pvc, Pvd] -
  k43f[k21ex, k31ex, k41ex, k43ex, PVa, PVb, Pvc, Pvd] * I3;

XmatF[DELTAO_, WB_, WC_, WD_, w1_,
  PVa_, PVb_, Pvc_, Pvd_, k21ex_, k31ex_, k41ex_, k43ex_] :=
  (LBz[DELTAO, WB, WC, WD, w1, PVa, PVb, Pvc, Pvd, k21ex, k31ex, k41ex, k43ex].
   LAz[DELTAO, WB, WC, WD, w1, PVa, PVb, Pvc, Pvd, k21ex, k31ex, k41ex, k43ex].
   LCz[DELTAO, WB, WC, WD, w1, PVa, PVb, Pvc, Pvd, k21ex, k31ex, k41ex, k43ex]) +
  (LBz[DELTAO, WB, WC, WD, w1, PVa, PVb, Pvc, Pvd, k21ex, k31ex, k41ex, k43ex].
   LAz[DELTAO, WB, WC, WD, w1, PVa, PVb, Pvc, Pvd, k21ex, k31ex, k41ex, k43ex].
   LDz[DELTAO, WB, WC, WD, w1, PVa, PVb, Pvc, Pvd, k21ex, k31ex, k41ex, k43ex]) +
  LBz[DELTAO, WB, WC, WD, w1, PVa, PVb, Pvc, Pvd, k21ex, k31ex, k41ex, k43ex].
  LCz[DELTAO, WB, WC, WD, w1, PVa, PVb, Pvc, Pvd, k21ex, k31ex, k41ex, k43ex].
  LDz[DELTAO, WB, WC, WD, w1, PVa, PVb, Pvc, Pvd, k21ex, k31ex, k41ex, k43ex] +
  LAz[DELTAO, WB, WC, WD, w1, PVa, PVb, Pvc, Pvd, k21ex, k31ex, k41ex, k43ex].
  LCz[DELTAO, WB, WC, WD, w1, PVa, PVb, Pvc, Pvd, k21ex, k31ex, k41ex, k43ex].
  LDz[DELTAO, WB, WC, WD, w1, PVa, PVb, Pvc, Pvd, k21ex, k31ex, k41ex, k43ex] -
  (k13f[k21ex, k31ex, k41ex, k43ex, PVa, PVb, Pvc, Pvd] * k31f[k21ex, k31ex, k41ex,
   k43ex, PVa, PVb, Pvc, Pvd] * I3 + k34f[k21ex, k31ex, k41ex, k43ex, PVa, PVb,
   Pvc, Pvd] * k43f[k21ex, k31ex, k41ex, k43ex, PVa, PVb, Pvc, Pvd] * I3).
  LBz[DELTAO, WB, WC, WD, w1, PVa, PVb, Pvc, Pvd, k21ex, k31ex, k41ex, k43ex] -
  (k34f[k21ex, k31ex, k41ex, k43ex, PVa, PVb, Pvc, Pvd] *
   k43f[k21ex, k31ex, k41ex, k43ex, PVa, PVb, Pvc, Pvd] * I3).
  LAz[DELTAO, WB, WC, WD, w1, PVa, PVb, Pvc, Pvd, k21ex, k31ex, k41ex, k43ex] -

```

```

(k12f[k21ex, k31ex, k41ex, k43ex, PVa, PVb, PVc, PVd] *
  k21f[k21ex, k31ex, k41ex, k43ex, PVa, PVb, PVc, PVd] * I3).
LCz[DELTAO, WB, WC, WD, w1, PVa, PVb, PVc, PVd, k21ex, k31ex, k41ex, k43ex] -
(k12f[k21ex, k31ex, k41ex, k43ex, PVa, PVb, PVc, PVd] * k21f[k21ex, k31ex, k41ex,
  k43ex, PVa, PVb, PVc, PVd] * I3 + k13f[k21ex, k31ex, k41ex, k43ex, PVa, PVb,
  PVc, PVd] * k31f[k21ex, k31ex, k41ex, k43ex, PVa, PVb, PVc, PVd] * I3).
LDz[DELTAO, WB, WC, WD, w1, PVa, PVb, PVc, PVd, k21ex, k31ex, k41ex, k43ex];
YmatF[DELTAO_, WB_, WC_, WD_, w1_, PVa_, PVb_, PVc_, PVd_,
  k21ex_, k31ex_, k41ex_, k43ex_] :=
LAz[DELTAO, WB, WC, WD, w1, PVa, PVb, PVc, PVd, k21ex, k31ex, k41ex, k43ex].
LBz[DELTAO, WB, WC, WD, w1, PVa, PVb, PVc, PVd, k21ex, k31ex, k41ex, k43ex] +
LAz[DELTAO, WB, WC, WD, w1, PVa, PVb, PVc, PVd, k21ex, k31ex, k41ex, k43ex].
LCz[DELTAO, WB, WC, WD, w1, PVa, PVb, PVc, PVd, k21ex, k31ex, k41ex, k43ex] +
LAz[DELTAO, WB, WC, WD, w1, PVa, PVb, PVc, PVd, k21ex, k31ex, k41ex, k43ex].
LDz[DELTAO, WB, WC, WD, w1, PVa, PVb, PVc, PVd, k21ex, k31ex, k41ex, k43ex] +
LBz[DELTAO, WB, WC, WD, w1, PVa, PVb, PVc, PVd, k21ex, k31ex, k41ex, k43ex].
LCz[DELTAO, WB, WC, WD, w1, PVa, PVb, PVc, PVd, k21ex, k31ex, k41ex, k43ex] +
LBz[DELTAO, WB, WC, WD, w1, PVa, PVb, PVc, PVd, k21ex, k31ex, k41ex, k43ex].
LDz[DELTAO, WB, WC, WD, w1, PVa, PVb, PVc, PVd, k21ex, k31ex, k41ex, k43ex] +
LCz[DELTAO, WB, WC, WD, w1, PVa, PVb, PVc, PVd, k21ex, k31ex, k41ex, k43ex].
LDz[DELTAO, WB, WC, WD, w1, PVa, PVb, PVc, PVd, k21ex, k31ex, k41ex, k43ex] -
k12f[k21ex, k31ex, k41ex, k43ex, PVa, PVb, PVc, PVd] *
  k21f[k21ex, k31ex, k41ex, k43ex, PVa, PVb, PVc, PVd] * I3 -
k13f[k21ex, k31ex, k41ex, k43ex, PVa, PVb, PVc, PVd] *
  k31f[k21ex, k31ex, k41ex, k43ex, PVa, PVb, PVc, PVd] * I3 -
k34f[k21ex, k31ex, k41ex, k43ex, PVa, PVb, PVc, PVd] *
  k43f[k21ex, k31ex, k41ex, k43ex, PVa, PVb, PVc, PVd] * I3;
ZmatF[DELTAO_, WB_, WC_, WD_, w1_, PVa_, PVb_, PVc_, PVd_,
  k21ex_, k31ex_, k41ex_, k43ex_] :=
(LBz[DELTAO, WB, WC, WD, w1, PVa, PVb, PVc, PVd, k21ex, k31ex, k41ex, k43ex].
  LAz[DELTAO, WB, WC, WD, w1, PVa, PVb, PVc, PVd, k21ex, k31ex, k41ex, k43ex].
  LCz[DELTAO, WB, WC, WD, w1, PVa, PVb, PVc, PVd, k21ex, k31ex, k41ex, k43ex].
  LDz[DELTAO, WB, WC, WD, w1, PVa, PVb, PVc, PVd, k21ex, k31ex, k41ex, k43ex]) -
(k34f[k21ex, k31ex, k41ex, k43ex, PVa, PVb, PVc, PVd] *
  k43f[k21ex, k31ex, k41ex, k43ex, PVa, PVb, PVc, PVd] * I3).
LBz[DELTAO, WB, WC, WD, w1, PVa, PVb, PVc, PVd, k21ex, k31ex, k41ex, k43ex].
LAz[DELTAO, WB, WC, WD, w1, PVa, PVb, PVc, PVd, k21ex, k31ex, k41ex, k43ex] -
(k13f[k21ex, k31ex, k41ex, k43ex, PVa, PVb, PVc, PVd] *
  k31f[k21ex, k31ex, k41ex, k43ex, PVa, PVb, PVc, PVd] * I3).
LBz[DELTAO, WB, WC, WD, w1, PVa, PVb, PVc, PVd, k21ex, k31ex, k41ex, k43ex].
LDz[DELTAO, WB, WC, WD, w1, PVa, PVb, PVc, PVd, k21ex, k31ex, k41ex, k43ex] -
(k12f[k21ex, k31ex, k41ex, k43ex, PVa, PVb, PVc, PVd] *
  k21f[k21ex, k31ex, k41ex, k43ex, PVa, PVb, PVc, PVd] * I3).

```

```

LCz[DELTAO, WB, WC, WD, w1, PVa, PVb, PVc, PVd, k21ex, k31ex, k41ex, k43ex].
LDz[DELTAO, WB, WC, WD, w1, PVa, PVb, PVc, PVd, k21ex, k31ex, k41ex, k43ex] +
(k12f[k21ex, k31ex, k41ex, k43ex, PVa, PVb, PVc, PVd] *
  k21f[k21ex, k31ex, k41ex, k43ex, PVa, PVb, PVc, PVd] *
  k34f[k21ex, k31ex, k41ex, k43ex, PVa, PVb, PVc, PVd] *
  k43f[k21ex, k31ex, k41ex, k43ex, PVa, PVb, PVc, PVd] * I3);

```

```

Out[979]= {{0, -DELTAO + PVb WB + PVc WC + PVd WD, 0},
           {DELTAO - PVb WB - PVc WC - PVd WD, 0, -w1}, {0, w1, 0}}

```

```

Out[980]= {{0, -DELTAO - WB + PVb WB + PVc WC + PVd WD, 0},
           {DELTAO + WB - PVb WB - PVc WC - PVd WD, 0, -w1}, {0, w1, 0}}

```

```

Out[981]= {{0, -DELTAO + PVb WB - WC + PVc WC + PVd WD, 0},
           {DELTAO - PVb WB + WC - PVc WC - PVd WD, 0, -w1}, {0, w1, 0}}

```

```

Out[982]= {{0, -DELTAO + PVb WB + PVc WC - WD + PVd WD, 0},
           {DELTAO - PVb WB - PVc WC + WD - PVd WD, 0, -w1}, {0, w1, 0}}

```

**These are definitions which are needed to calculate the Woodbury approximation for the 4 - site kite scheme (Eq. 53)**

```

In[990]:= Umat = ArrayFlatten[{{-I3}, {0 I3}, {0 I3}, {I3}}];
MatrixForm[Umat]
Vmat[k2lex_, k3lex_, k4lex_, k43ex_, Pa_, Pb_, Pc_, Pd_] :=
  ArrayFlatten[{{k14f[k2lex, k3lex, k4lex, k43ex, Pa, Pb, Pc, Pd] I3,
    0 I3, 0 I3, -k41f[k2lex, k3lex, k4lex, k43ex, Pa, Pb, Pc, Pd] I3}}];
InvLK[DELTAO_, WB_, WC_, WD_, w1_, k2lex_, k3lex_, k4lex_,
  k43ex_, Pa_, Pb_, Pc_, Pd_] :=
  Inverse[BigL[DELTAO - Pb * WB - Pc * WC - Pd * WD, WB + (DELTAO - Pb * WB - Pc * WC - Pd * WD),
    WC + (DELTAO - Pb * WB - Pc * WC - Pd * WD), WD + (DELTAO - Pb * WB - Pc * WC - Pd * WD), w1] +
    Klinearmatrix[k2lex, k3lex, k4lex, k43ex, Pa, Pb, Pc, Pd]];
InvLKsq[DELTAO_, WB_, WC_, WD_, w1_, k2lex_, k3lex_, k4lex_, k43ex_, Pa_, Pb_,
  Pc_, Pd_] := InvLK[DELTAO, WB, WC, WD, w1, k2lex, k3lex, k4lex, k43ex, Pa, Pb, Pc, Pd].
  InvLK[DELTAO, WB, WC, WD, w1, k2lex, k3lex, k4lex, k43ex, Pa, Pb, Pc, Pd]
TrZVersion1[DELTAO_, WB_, WC_, WD_, w1_, k2lex_, k3lex_, k4lex_, k43ex_,
  Pa_, Pb_, Pc_, Pd_] := Tr[(Vmat[k2lex, k3lex, k4lex, k43ex, Pa, Pb, Pc, Pd].
  InvLKsq[DELTAO, WB, WC, WD, w1, k2lex, k3lex, k4lex, k43ex, Pa, Pb, Pc, Pd].Umat).
  Inverse[I3 + Vmat[k2lex, k3lex, k4lex, k43ex, Pa, Pb, Pc, Pd].
  InvLK[DELTAO, WB, WC, WD, w1, k2lex, k3lex, k4lex, k43ex, Pa, Pb, Pc, Pd].Umat]]

```

Out[991]/MatrixForm=

$$\begin{pmatrix} -1 & 0 & 0 \\ 0 & -1 & 0 \\ 0 & 0 & -1 \\ 0 & 0 & 0 \\ 0 & 0 & 0 \\ 0 & 0 & 0 \\ 0 & 0 & 0 \\ 0 & 0 & 0 \\ 0 & 0 & 0 \\ 1 & 0 & 0 \\ 0 & 1 & 0 \\ 0 & 0 & 1 \end{pmatrix}$$

These are all numerical calculation and all approximations for all three considered four - site - schemes.

```

In[996]:= fourlinearexact[DELTAO_, WB_, WC_, WD_,
  w1_, k2lex_, k3lex_, k4lex_, k43ex_, Pa_, Pb_, Pc_, Pd_] :=
  -N[Re[Eigenvalues[linearLK[DELTAO, WB, WC, WD, w1, k2lex, k3lex, k4lex, k43ex, Pa,
    Pb, Pc, Pd]]][[12]] / sinsqtheta[DELTAO, WB, WC, WD, w1, Pa, Pb, Pc, Pd]];
fourlinearfirstorder[DELTAO_, WB_, WC_, WD_, w1_, k2lex_, k3lex_,
  k4lex_, k43ex_, Pa_, Pb_, Pc_, Pd_] :=
  - (1 / Tr[Inverse[linearLK[DELTAO, WB, WC, WD, w1,
    k2lex, k3lex, k4lex, k43ex, Pa, Pb, Pc, Pd]]]) /
  sinsqtheta[DELTAO, WB, WC, WD, w1, Pa, Pb, Pc, Pd];
fourlinearsecondorder[DELTAO_, WB_, WC_, WD_, w1_, k2lex_,
  k3lex_, k4lex_, k43ex_, PVa_, PVb_, PVc_, PVd_] :=
  - (1 / (Tr[Inverse[ZmatF[DELTAO, WB, WC, WD, w1, PVa, PVb, PVc,
    PVd, k2lex, k3lex, k4lex, k43ex]].XmatF[DELTAO, WB, WC,

```

```

WD, w1, PVa, PVb, PVc, PVd, k2lex, k3lex, k4lex, k43ex]] -
Tr[Inverse[ZmatF[DELTAO, WB, WC, WD, w1, PVa, PVb, PVc, PVd, k2lex,
k3lex, k4lex, k43ex]].YmatF[DELTAO, WB, WC, WD, w1, PVa, PVb, PVc, PVd,
k2lex, k3lex, k4lex, k43ex] + Minors[Inverse[ZmatF[DELTAO, WB, WC,
WD, w1, PVa, PVb, PVc, PVd, k2lex, k3lex, k4lex, k43ex]].XmatF[DELTAO,
WB, WC, WD, w1, PVa, PVb, PVc, PVd, k2lex, k3lex, k4lex, k43ex]]] /
Tr[Inverse[ZmatF[DELTAO, WB, WC, WD, w1, PVa, PVb, PVc, PVd,
k2lex, k3lex, k4lex, k43ex]].XmatF[DELTAO, WB, WC,
WD, w1, PVa, PVb, PVc, PVd, k2lex, k3lex, k4lex, k43ex]])] /
sinsqtheta[DELTAO, WB, WC, WD, w1, PVa, PVb,
PVC,
PVd];

fourkiteexact[DELTAO_, WB_, WC_, WD_, w1_,
k2lex_, k3lex_, k4lex_, k43ex_, Pa_, Pb_, Pc_, Pd_] :=
-N[Re[Eigenvalues[kiteLK[DELTAO, WB, WC, WD, w1, k2lex, k3lex, k4lex, k43ex, Pa,
Pb, Pc, Pd]]][[12]]] / sinsqtheta[DELTAO, WB, WC, WD, w1, Pa, Pb, Pc, Pd]
fourkitefirstorder[DELTAO_, WB_, WC_, WD_, w1_, k2lex_, k3lex_,
k4lex_, k43ex_, Pa_, Pb_, Pc_, Pd_] :=
-(1 / Tr[Inverse[kiteLK[DELTAO, WB, WC, WD, w1, k2lex, k3lex, k4lex, k43ex, Pa,
Pb, Pc, Pd]]]) / sinsqtheta[DELTAO, WB, WC, WD, w1, Pa, Pb, Pc, Pd];
fourkitewoodbury[DELTAO_, WB_, WC_, WD_, w1_, k2lex_, k3lex_,
k4lex_, k43ex_, Pa_, Pb_, Pc_, Pd_] :=
fourlinearsecondorder[DELTAO, WB, WC, WD, w1, k2lex, k3lex, k4lex, k43ex,
Pa, Pb, Pc, Pd] * (1 / (1 + sinsqtheta[DELTAO, WB, WC, WD, w1, Pa, Pb, Pc, Pd] *
fourlinearfirstorder[DELTAO, WB, WC, WD, w1, k2lex, k3lex,
k4lex, k43ex, Pa, Pb, Pc, Pd] * TrZVersion1[DELTAO, WB,
WC, WD, w1, k2lex, k3lex, k4lex, k43ex, Pa, Pb, Pc, Pd]))

fourstarexact[DELTAO_, WB_, WC_, WD_,
w1_, k2lex_, k3lex_, k4lex_, k43ex_, Pa_, Pb_, Pc_, Pd_] :=
-N[Re[Eigenvalues[starlk[DELTAO, WB, WC, WD, w1, k2lex, k3lex, k4lex, Pa, Pb,
Pc, Pd]]][[12]]] / sinsqtheta[DELTAO, WB, WC, WD, w1, Pa, Pb, Pc, Pd];
fourstarfirstorder[DELTAO_, WB_, WC_, WD_, w1_, k2lex_, k3lex_,
k4lex_, k43ex_, Pa_, Pb_, Pc_, Pd_] :=
-(1 / Tr[Inverse[starlk[DELTAO, WB, WC, WD, w1, k2lex, k3lex, k4lex, Pa, Pb,
Pc, Pd]]]) / sinsqtheta[DELTAO, WB, WC, WD, w1, Pa, Pb, Pc, Pd];

```

In this additional section, the numerical solution for three-state linear exchange is calculated (see also script for three sites). One of the figure demonstrates how to use pseudo-sites comparing a 4-site kite-scheme with a pseudo-site with a linear 3-site scheme.

```
In[1004]= k23ft[k21ex_, k31ex_, k32ex_, Pa_, Pb_, Pc_] = k32ex / (1 + Pb / Pc);
k13ft[k21ex_, k31ex_, k32ex_, Pa_, Pb_, Pc_] = k31ex / (1 + Pa / Pc);
k12ft[k21ex_, k31ex_, k32ex_, Pa_, Pb_, Pc_] = k21ex / (1 + Pa / Pb);
k32ft[k21ex_, k31ex_, k32ex_, Pa_, Pb_, Pc_] = k32ex - k32ex / (1 + Pb / Pc);
k31ft[k21ex_, k31ex_, k32ex_, Pa_, Pb_, Pc_] = k31ex - k31ex / (1 + Pa / Pc);
k21ft[k21ex_, k31ex_, k32ex_, Pa_, Pb_, Pc_] = k21ex - k21ex / (1 + Pa / Pb);
Klinearthree[k21ex_, k31ex_, k32ex_, Pa_, Pb_, Pc_] = ArrayFlatten[
  {{(-k12ft[k21ex, k31ex, k32ex, Pa, Pb, Pc] - k13ft[k21ex, k31ex, k32ex, Pa, Pb, Pc])
    I3, k21ft[k21ex, k31ex, k32ex, Pa, Pb, Pc] I3,
    k31ft[k21ex, k31ex, k32ex, Pa, Pb, Pc] I3},
  {k12ft[k21ex, k31ex, k32ex, Pa, Pb, Pc] I3,
    -k21ft[k21ex, k31ex, k32ex, Pa, Pb, Pc] I3, 0 I3},
  {k13ft[k21ex, k31ex, k32ex, Pa, Pb, Pc] I3, 0 I3,
    -k31ft[k21ex, k31ex, k32ex, Pa, Pb, Pc] I3}}];
MatrixForm[Klinearthree[k21ex_, k31ex_, k32ex_, Pa_, Pb_, Pc_]]
BigLthree[WA_, WB_, WC_, w1_] =
  ArrayFlatten[{{LA, 0 I3, 0 I3}, {0 I3, LB, 0 I3}, {0 I3, 0 I3, LC}}];
sinsqthetathree[DELTAO_, WB_, WC_, w1_, Pa_, Pb_, Pc_] :=
  (w1^2 / (w1^2 + ((DELTAO - Pb * WB - Pc * WC) * Pa +
    (WB + (DELTAO - Pb * WB - Pc * WC)) * Pb + (WC + (DELTAO - Pb * WB - Pc * WC)) * Pc)^2))
threelinearexact[DELTAO_, WB_, WC_, w1_, k21ex_, k31ex_, k32ex_, Pa_, Pb_, Pc_] :=
  -N[Re[Eigenvalues[Klinearthree[k21ex, k31ex, k32ex, Pa, Pb, Pc] +
    BigLthree[DELTAO - Pb * WB - Pc * WC, WB + (DELTAO - Pb * WB - Pc * WC),
    WC + (DELTAO - Pb * WB - Pc * WC), w1]]]] /
  sinsqthetathree[DELTAO, WB, WC, w1, Pa, Pb, Pc]
```

```
Out[1011]/MatrixForm=
(
  - k21ex_ / (1 + Pa_ / Pb_) - k31ex_ / (1 + Pa_ / Pc_) 0 0 k21ex_ - k21ex_ / (1 + Pa_ / Pb_) 0 0
  0 - k21ex_ / (1 + Pa_ / Pb_) - k31ex_ / (1 + Pa_ / Pc_) 0 0 k21ex_ - k21ex_ / (1 + Pa_ / Pb_) 0
  0 0 - k21ex_ / (1 + Pa_ / Pb_) - k31ex_ / (1 + Pa_ / Pc_) 0 0 k21ex_ - k21ex_ / (1 + Pa_ / Pb_)
  k21ex_ / (1 + Pa_ / Pb_) 0 0 -k21ex_ + k21ex_ / (1 + Pa_ / Pb_) 0 0
  0 k21ex_ / (1 + Pa_ / Pb_) 0 0 -k21ex_ + k21ex_ / (1 + Pa_ / Pb_) 0
  0 0 k21ex_ / (1 + Pa_ / Pb_) 0 0 -k21ex_ + k21ex_ / (1 + Pa_ / Pb_)
  k31ex_ / (1 + Pa_ / Pc_) 0 0 0 0 0 0
  0 k31ex_ / (1 + Pa_ / Pc_) 0 0 0 0
  0 0 k31ex_ / (1 + Pa_ / Pc_) 0 0 0
  0 0 k31ex_ / (1 + Pa_ / Pc_) 0 0 0
)

```

The following sections plot Figures S7, S6, 4 and 4(insets). Refer to paper for details.



```

In[1015]= Plot[{fourkiteexact[x, -500, 200, 0, 100, 10, 500, 10 000, 10 000, 0.84999, 0.1, 0.05,
  0.00001], threelinearexact[x, -500, 200, 100, 10, 500, 1000, 0.85, 0.1, 0.05],
  fourkitewoodbury[x, -500, 200, 0, 100, 10, 500, 10 000, 1000,
  0.84999, 0.1, 0.05, 0.0001]}, {x, -500, 1000}], GridLines -> None,
FrameLabel -> {" $\Delta\Omega$  /s-1", "Rex /s-1"}, PlotRange -> {{-500, 1000}, {0, 30}},
Axes -> None, BaseStyle -> {FontSize -> 13}, Frame -> True, PlotTheme -> "Monochrome",
PlotLegends -> {"kite numerical", "linear exact", "kite Woodbury"}]

```

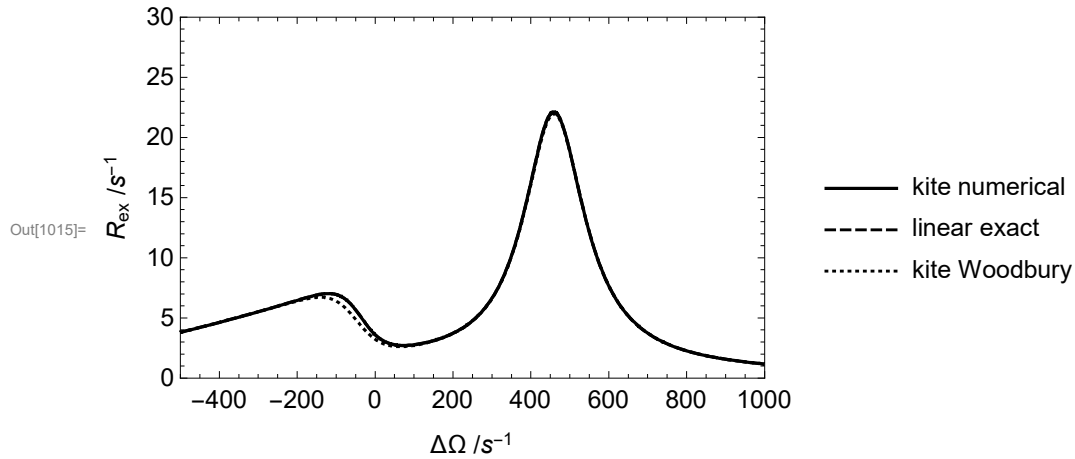

```

In[1016]= a = 0.85; b = 0.7; d = 3; y = 350; f = 500; g = 1000; h = 500; kf = 1; kg = 1;
pax = 0.33
Plot[{fourkiteexact[x, a * -1000, a * 3000, a * -5000, y, b * 200, b * h, b * f, kg * b * g,
  pax, 10 * (1 - pax) / 16 + (1 - kf) * 1 * (1 - pax) / 16, 5 * (1 - pax) / 16, kf * (1 - pax) / 16],
  fourkitefirstorder[x, a * -1000, a * 3000, a * -5000, y, b * 200, b * h, b * f, kg * b * g,
  pax, 10 * (1 - pax) / 16 + (1 - kf) * 1 * (1 - pax) / 16, 5 * (1 - pax) / 16, kf * (1 - pax) / 16],
  fourkitewoodbury[x, a * -1000, a * 3000, a * -5000, y, b * 200, b * h, b * f, kg * b * g, pax,
  10 * (1 - pax) / 16 + (1 - kf) * 1 * (1 - pax) / 16, 5 * (1 - pax) / 16, kf * (1 - pax) / 16]},
{x, -3000 * d * a, 3000 * d * a}, PlotRange -> {{-3000 * d * a, 3000 * d * a}, {0, 1600}},
GridLines -> None, FrameLabel -> {" $\Delta\Omega$  / s-1", "Rex / s-1"}, Axes -> None,
BaseStyle -> {FontSize -> 13}, Frame -> True, PlotTheme -> "Monochrome",
PlotLegends -> {"kite numeric", "kite first order", "kite Woodbury"]}
a = 0.85; b = 0.7; d = 3; y = 350; f = 500; g = 1000; h = 500; kf = 1; kg = 1;
pax = 0.55
Plot[{fourkiteexact[x, a * -1000, a * 3000, a * -5000, y, b * 200, b * h, b * f, kg * b * g,
  pax, 10 * (1 - pax) / 16 + (1 - kf) * 1 * (1 - pax) / 16, 5 * (1 - pax) / 16, kf * (1 - pax) / 16],
  fourkitefirstorder[x, a * -1000, a * 3000, a * -5000, y, b * 200, b * h, b * f, kg * b * g,
  pax, 10 * (1 - pax) / 16 + (1 - kf) * 1 * (1 - pax) / 16, 5 * (1 - pax) / 16, kf * (1 - pax) / 16],
  fourkitewoodbury[x, a * -1000, a * 3000, a * -5000, y, b * 200, b * h, b * f, kg * b * g, pax,
  10 * (1 - pax) / 16 + (1 - kf) * 1 * (1 - pax) / 16, 5 * (1 - pax) / 16, kf * (1 - pax) / 16]},
{x, -3000 * d * a, 3000 * d * a}, PlotRange -> {{-3000 * d * a, 3000 * d * a}, {0, 1400}},
GridLines -> None, FrameLabel -> {" $\Delta\Omega$  / s-1", "Rex / s-1"}, Axes -> None,
BaseStyle -> {FontSize -> 13}, Frame -> True, PlotTheme -> "Monochrome",
PlotLegends -> {"kite numeric", "kite first order", "kite Woodbury"]}
a = 0.85; b = 0.7; d = 3; y = 350; f = 500; g = 1000; h = 500; kf = 1; kg = 1;
pax = 0.88
Plot[{fourkiteexact[x, a * -1000, a * 3000, a * -5000, y, b * 200, b * h, b * f, kg * b * g,
  pax, 10 * (1 - pax) / 16 + (1 - kf) * 1 * (1 - pax) / 16, 5 * (1 - pax) / 16, kf * (1 - pax) / 16],
  fourkitefirstorder[x, a * -1000, a * 3000, a * -5000, y, b * 200, b * h, b * f, kg * b * g,
  pax, 10 * (1 - pax) / 16 + (1 - kf) * 1 * (1 - pax) / 16, 5 * (1 - pax) / 16, kf * (1 - pax) / 16],
  fourkitewoodbury[x, a * -1000, a * 3000, a * -5000, y, b * 200, b * h, b * f, kg * b * g, pax,
  10 * (1 - pax) / 16 + (1 - kf) * 1 * (1 - pax) / 16, 5 * (1 - pax) / 16, kf * (1 - pax) / 16]},
{x, -3000 * d * a, 3000 * d * a}, PlotRange -> {{-3000 * d * a, 3000 * d * a}, {0, 400}},
GridLines -> None, FrameLabel -> {" $\Delta\Omega$  / s-1", "Rex / s-1"}, Axes -> None,
BaseStyle -> {FontSize -> 13}, Frame -> True, PlotTheme -> "Monochrome",
PlotLegends -> {"kite numeric", "kite first order", "kite Woodbury"]}

```

Out[1017]= 0.33

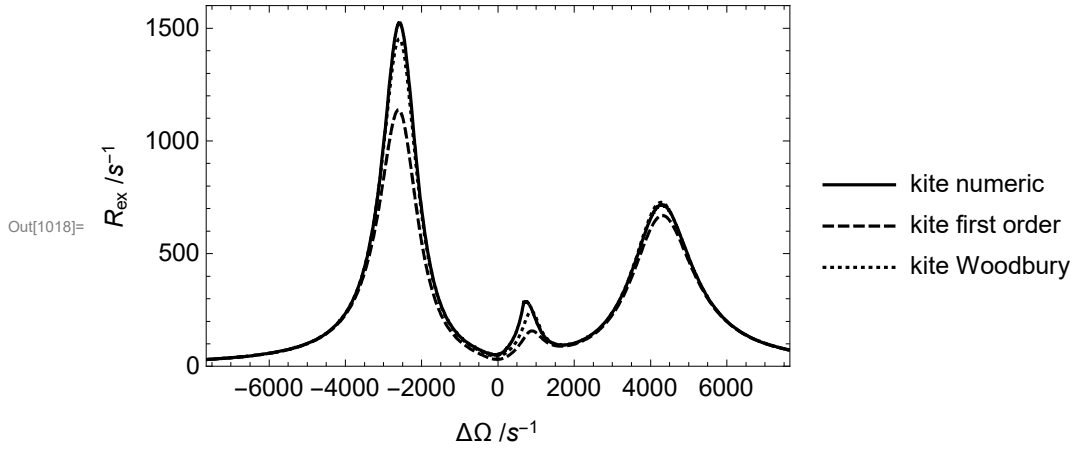

Out[1020]= 0.55

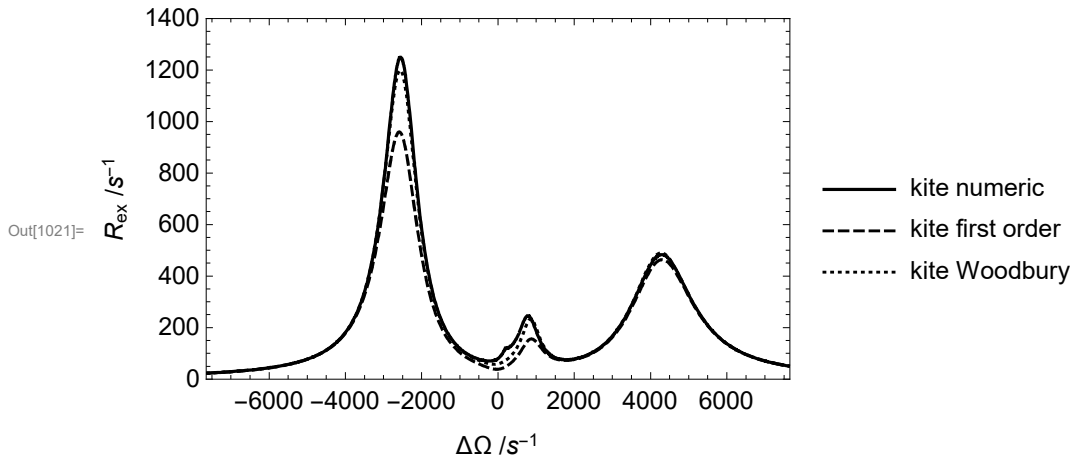

Out[1023]= 0.88

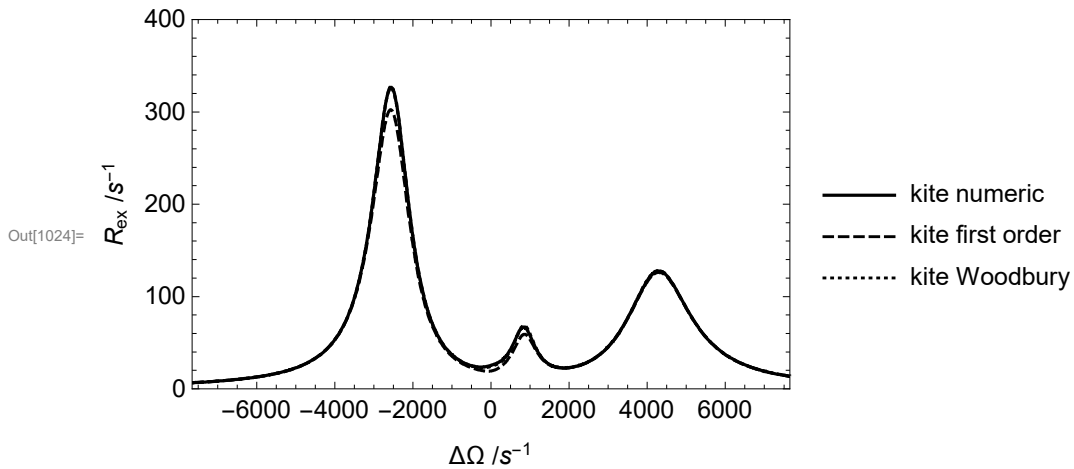

```

In[1025]= Plot3D[
  {Abs[fourkiteexact[x, a * -1000, a * 3000, a * -5000, y, b * 200, b * 500, b * 500, b * 1000,
    pax, 10 * (1 - pax) / 16, 5 * (1 - pax) / 16, 1 * (1 - pax) / 16] -
    fourkitefirstorder[x, a * -1000, a * 3000, a * -5000, y, b * 200, b * 500,
    b * 500, b * 1000, pax, 10 * (1 - pax) / 16, 5 * (1 - pax) / 16, 1 * (1 - pax) / 16]}],
  {x, -3000 * 2 * a, 3000 * 2 * a}, {pax, 0.2, 0.99}, AxesStyle → Directive[Black],
  PlotRange → {{-5000, 5000}, {0.25, 1}, {0, 500}},
  BaseStyle → {FontSize → 13, FontColor → Black},
  PlotLegends → {"abs(kite numerical-kite first order)"},
  ViewPoint → {-Pi / 2, -Pi, 1}]
Plot3D[{xx, Abs[fourkiteexact[x, a * -1000, a * 3000, a * -5000, y, b * 200, b * 500,
  b * 500, b * 1000, pax, 10 * (1 - pax) / 16, 5 * (1 - pax) / 16, 1 * (1 - pax) / 16] -
  fourkitewoodbury[x, a * -1000, a * 3000, a * -5000, y, b * 200, b * 500, b * 500,
  b * 1000, pax, 10 * (1 - pax) / 16, 5 * (1 - pax) / 16, 1 * (1 - pax) / 16]}],
  {x, -3000 * 2 * a, 3000 * 2 * a}, {pax, 0.2, 0.99},
  AxesStyle → Directive[Black],
  PlotRange → {{-5000, 5000}, {0.25, 1}, {0, 500}},
  BaseStyle → {FontSize → 13, FontColor → Black},
  PlotLegends → {"_", "abs(kite numerical-kite Woodbury)"},
  ViewPoint → {-Pi / 2, -Pi, 1}]

```

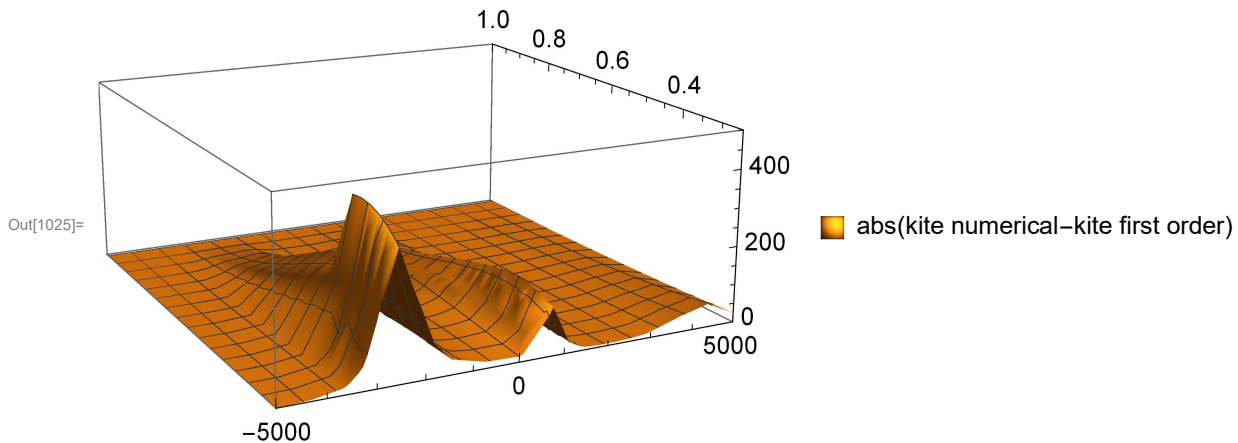

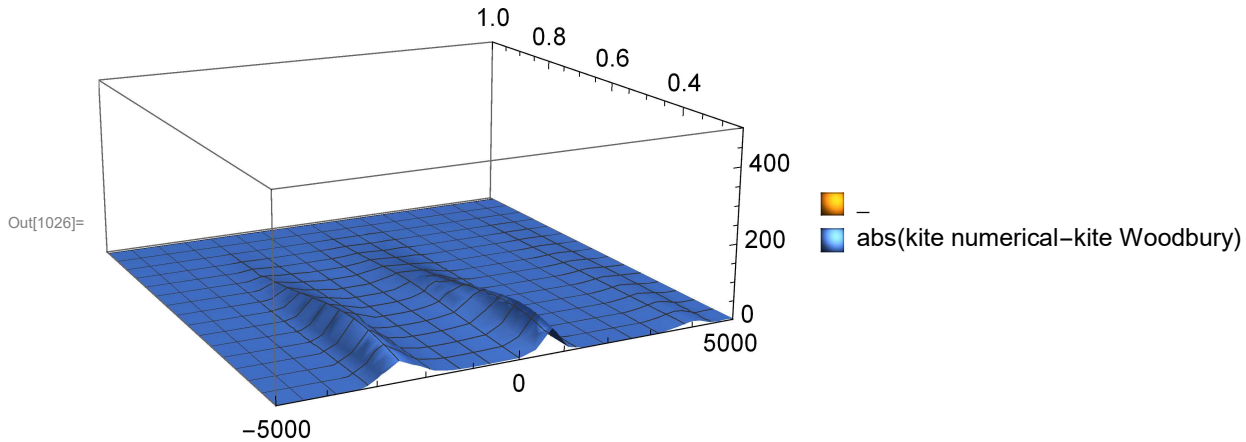

```

In[1027]= a = 0.9;
b = 0.05;
d = 3;
y = 50;
f = 500;
g = 1000;
h = 500;
w1x = 1250;
ran1 = 8000;
ran2 = 8000;
ran3 = 50;
Plot[{fourstarexact[x, -850, 2550, -4250, w1x, 140, 350,
      350, 700, 0.92, 0.05, 0.025, 0.005], fourstarfirstorder[x, -850,
      2550, -4250, w1x, 140, 350, 350, 700, 0.92, 0.05, 0.025, 0.005]}],
{x, -ran1, ran2}, PlotRange -> {{-ran1, ran2}, {0, ran3}}, GridLines -> None,
FrameLabel -> {"ΔΩ /s-1", "Rex /s-1"}, Axes -> None,
BaseStyle -> {FontSize -> 13}, Frame -> True, PlotTheme -> "Monochrome",
PlotLegends -> {"star numeric", "linear first order"}]
Plot[{fourkiteexact[x, -850, 2550, -4250, w1x, 140, 350, 350, 700, 0.92,
      0.05, 0.025, 0.005], fourkitefirstorder[x, -850, 2550, -4250, w1x,
      140, 350, 350, 700, 0.92, 0.05, 0.025, 0.005], fourkitewoodbury[x,
      -850, 2550, -4250, w1x, 140, 350, 350, 700, 0.92, 0.05, 0.025, 0.005]}],
{x, -ran1, ran2}, PlotRange -> {{-ran1, ran2}, {0, ran3}}, GridLines -> None,
FrameLabel -> {"ΔΩ /s-1", "Rex /s-1"}, Axes -> None,
BaseStyle -> {FontSize -> 13}, Frame -> True, PlotTheme -> "Monochrome",
PlotLegends -> {"kite numeric", "kite first order", "kite Woodbury"}]
Plot[{fourlinearexact[x, -850, 2550, -4250, w1x, 140, 350, 350, 700, 0.92,
      0.05, 0.025, 0.005], fourlinearfirstorder[x, -850, 2550, -4250, w1x,
      140, 350, 350, 700, 0.92, 0.05, 0.025, 0.005], fourlinearsecondorder[x,
      -850, 2550, -4250, w1x, 140, 350, 350, 700, 0.92, 0.05, 0.025, 0.005]}],
{x, -ran1, ran2}, PlotRange -> {{-ran1, ran2}, {0, ran3}}, GridLines -> None,

```

```

FrameLabel → {"ΔΩ /s-1", "Rex /s-1"}, Axes → None,
BaseStyle → {FontSize → 13}, Frame → True, PlotTheme → "Monochrome",
PlotLegends → {"linear numeric", "linear first order", "linear second order"}]
w1x = 350; ran1 = 8000; ran2 = 8000; ran3 = 250;
Plot[{fourstarexact[x, -850, 2550, -4250, w1x, 140, 350,
      350, 700, 0.92, 0.05, 0.025, 0.005], fourstarfirstorder[x, -850,
      2550, -4250, w1x, 140, 350, 350, 700, 0.92, 0.05, 0.025, 0.005]}],
{x, -ran1, ran2}, PlotRange → {{-ran1, ran2}, {0, ran3}}, GridLines → None,
FrameLabel → {"ΔΩ /s-1", "Rex /s-1"}, Axes → None,
BaseStyle → {FontSize → 13}, Frame → True, PlotTheme → "Monochrome",
PlotLegends → {"star numeric", "linear first order"}]
Plot[{fourkiteexact[x, -850, 2550, -4250, w1x, 140, 350, 350, 700, 0.92,
      0.05, 0.025, 0.005], fourkitefirstorder[x, -850, 2550, -4250, w1x,
      140, 350, 350, 700, 0.92, 0.05, 0.025, 0.005], fourkitewoodbury[x,
      -850, 2550, -4250, w1x, 140, 350, 350, 700, 0.92, 0.05, 0.025, 0.005]}],
{x, -ran1, ran2}, PlotRange → {{-ran1, ran2}, {0, ran3}}, GridLines → None,
FrameLabel → {"ΔΩ /s-1", "Rex /s-1"}, Axes → None,
BaseStyle → {FontSize → 13}, Frame → True, PlotTheme → "Monochrome",
PlotLegends → {"kite numeric", "kite first order", "kite Woodbury"}]
Plot[{fourlinearexact[x, -850, 2550, -4250, w1x, 140, 350, 350, 700, 0.92,
      0.05, 0.025, 0.005], fourlinearfirstorder[x, -850, 2550, -4250, w1x,
      140, 350, 350, 700, 0.92, 0.05, 0.025, 0.005], fourlinearsecondorder[x,
      -850, 2550, -4250, w1x, 140, 350, 350, 700, 0.92, 0.05, 0.025, 0.005]}],
{x, -ran1, ran2}, PlotRange → {{-ran1, ran2}, {0, ran3}}, GridLines → None,
FrameLabel → {"ΔΩ /s-1", "Rex /s-1"}, Axes → None,
BaseStyle → {FontSize → 13}, Frame → True, PlotTheme → "Monochrome",
PlotLegends → {"linear numeric", "linear first order", "linear second order"}]
w1x = 50; ran1 = 8000; ran2 = 8000; ran3 = 500;
Plot[{fourstarexact[x, -850, 2550, -4250, w1x, 140, 350,
      350, 700, 0.92, 0.05, 0.025, 0.005], fourstarfirstorder[x, -850,
      2550, -4250, w1x, 140, 350, 350, 700, 0.92, 0.05, 0.025, 0.005]}],
{x, -ran1, ran2}, PlotRange → {{-ran1, ran2}, {0, ran3}}, GridLines → None,
FrameLabel → {"ΔΩ /s-1", "Rex /s-1"}, Axes → None,
BaseStyle → {FontSize → 13}, Frame → True, PlotTheme → "Monochrome",
PlotLegends → {"star numeric", "linear first order"}]
Plot[{fourkiteexact[x, -850, 2550, -4250, w1x, 140, 350, 350, 700, 0.92,
      0.05, 0.025, 0.005], fourkitefirstorder[x, -850, 2550, -4250, w1x,
      140, 350, 350, 700, 0.92, 0.05, 0.025, 0.005], fourkitewoodbury[x,
      -850, 2550, -4250, w1x, 140, 350, 350, 700, 0.92, 0.05, 0.025, 0.005]}],
{x, -ran1, ran2}, PlotRange → {{-ran1, ran2}, {0, ran3}}, GridLines → None,
FrameLabel → {"ΔΩ /s-1", "Rex /s-1"}, Axes → None,
BaseStyle → {FontSize → 13}, Frame → True, PlotTheme → "Monochrome",
PlotLegends → {"kite numeric", "kite first order", "kite Woodbury"}]

```

```
Plot[{fourlinearexact[x, -850, 2550, -4250, w1x, 140, 350, 350, 700, 0.92,
  0.05, 0.025, 0.005], fourlinearfirstorder[x, -850, 2550, -4250, w1x,
  140, 350, 350, 700, 0.92, 0.05, 0.025, 0.005], fourlinearsecondorder[x,
  -850, 2550, -4250, w1x, 140, 350, 350, 700, 0.92, 0.05, 0.025, 0.005]},
{x, -ran1, ran2}, PlotRange -> {{-ran1, ran2}, {0, ran3}}, GridLines -> None,
FrameLabel -> {" $\Delta\Omega$  /s-1", "Rex /s-1"}, Axes -> None,
BaseStyle -> {FontSize -> 13}, Frame -> True, PlotTheme -> "Monochrome",
PlotLegends -> {"linear numeric", "linear first order", "linear second order"}]
```

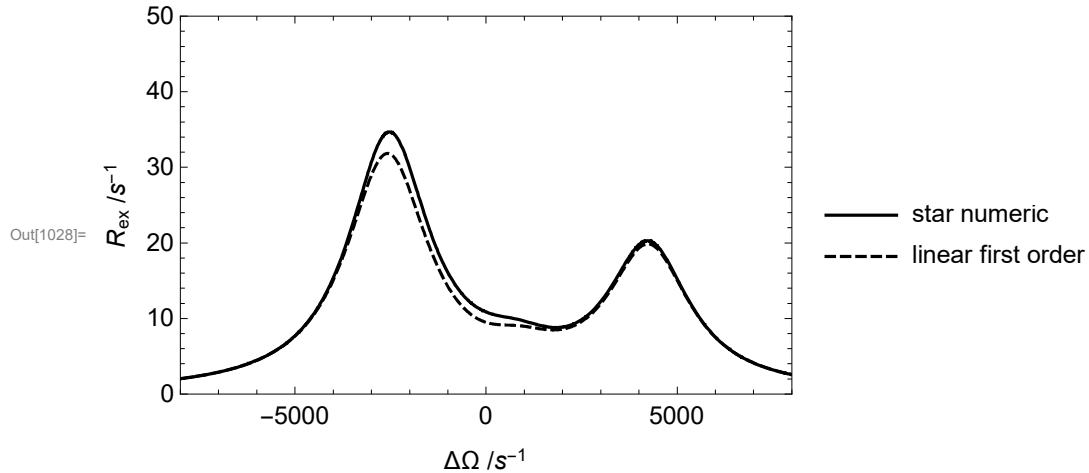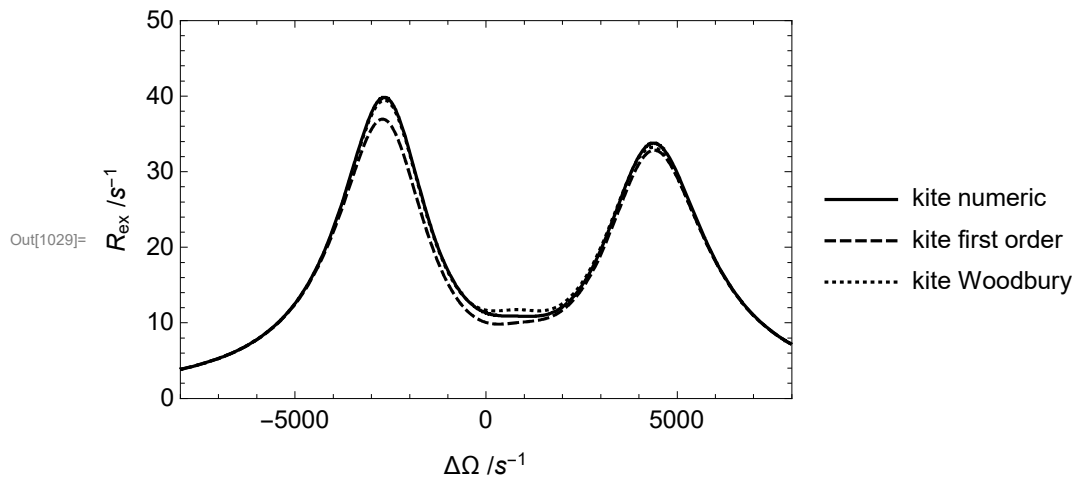

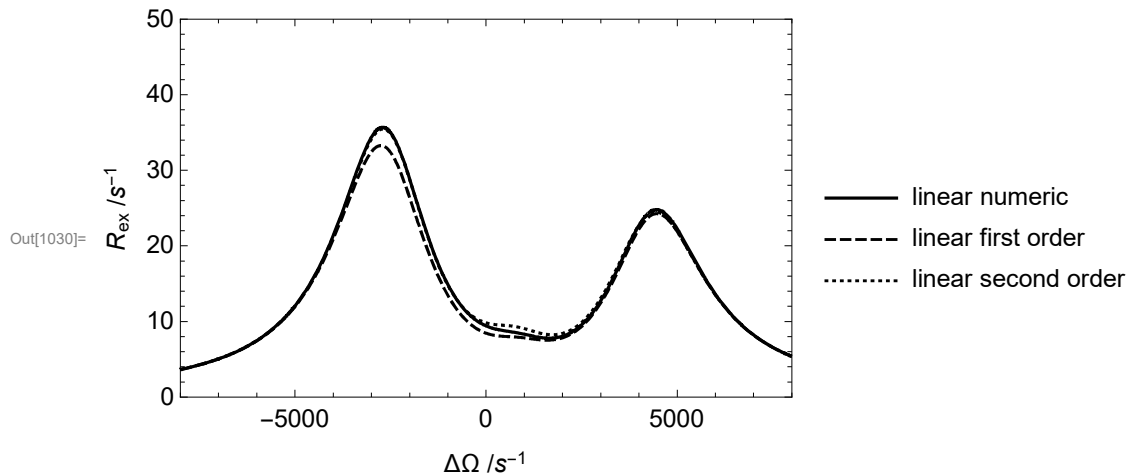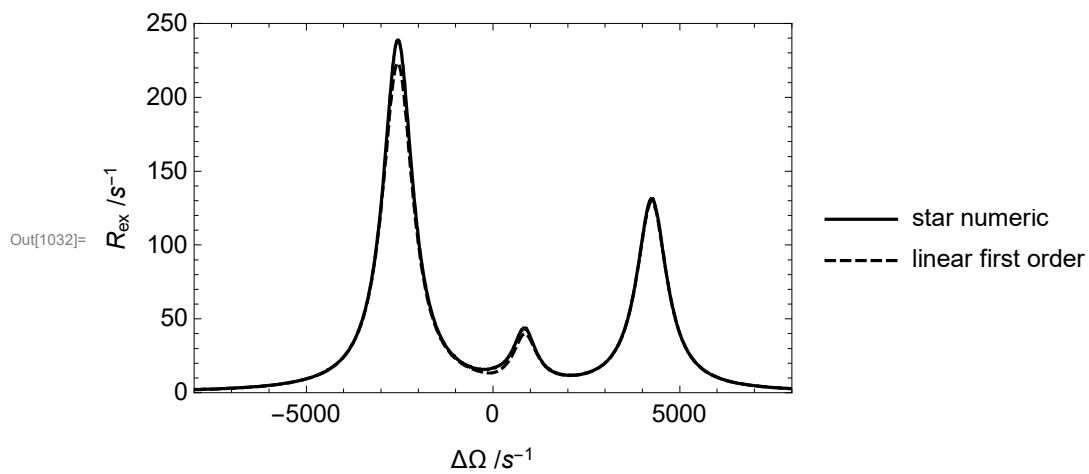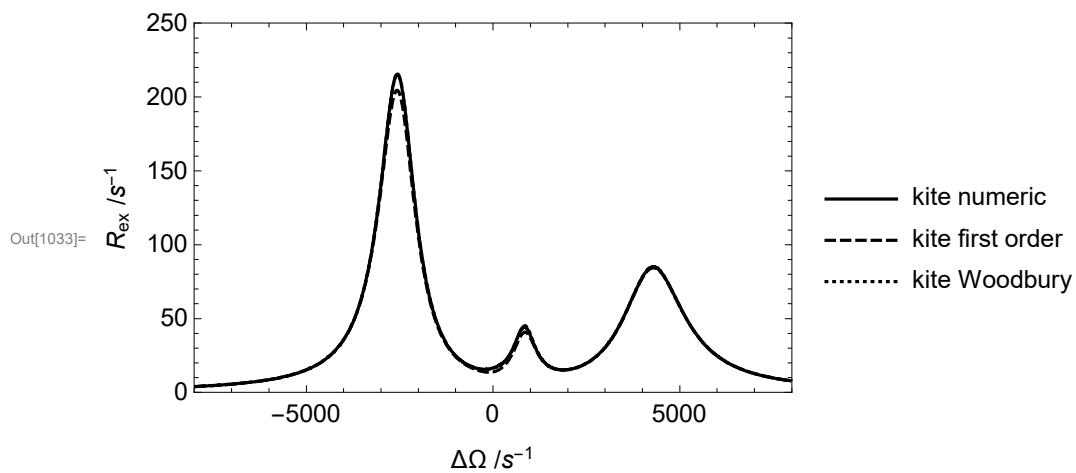



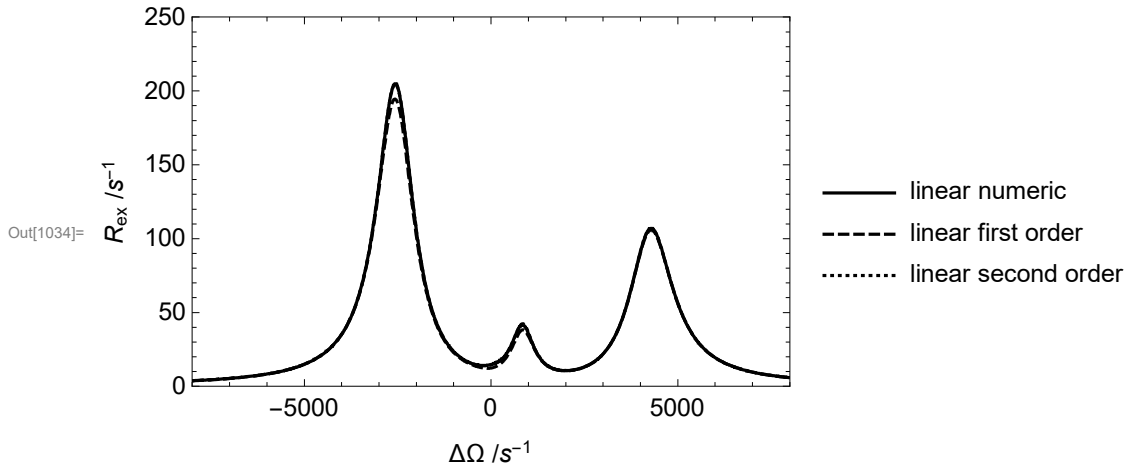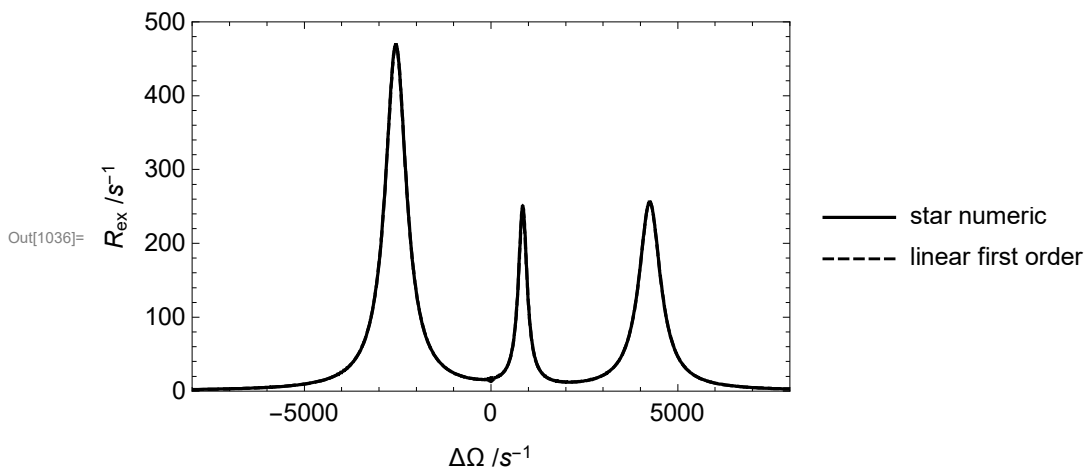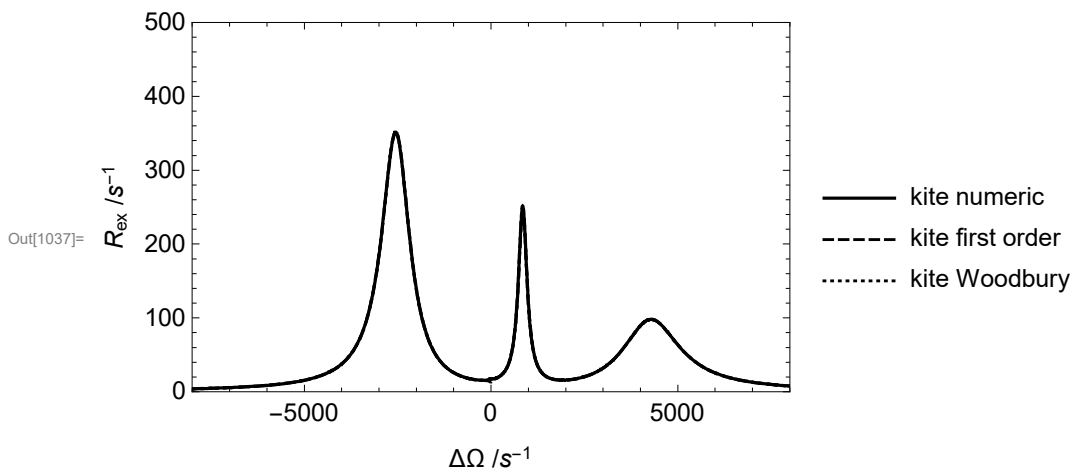

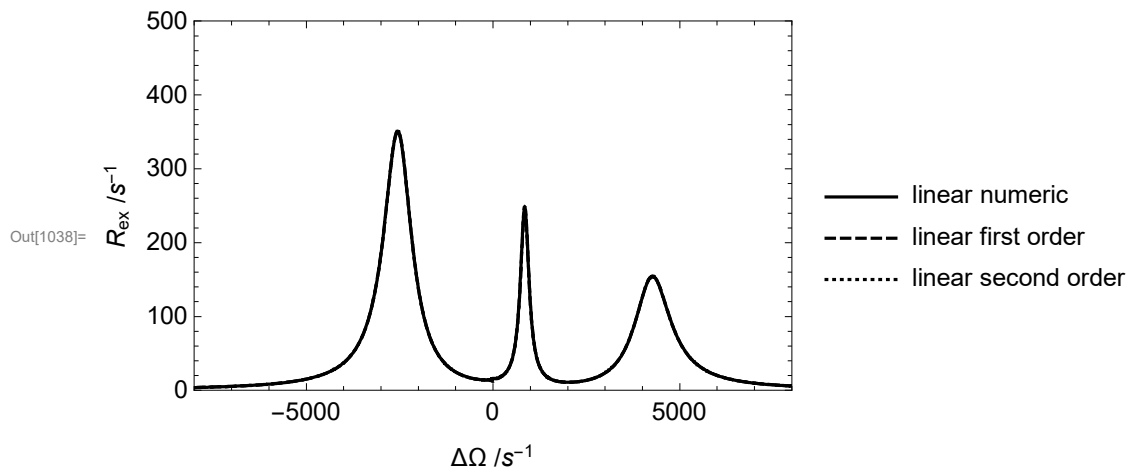

```

In[1039]:= a = 0.85;
b = 0.7;
d = 3;
y = 500;
f = 500;
g = 1000;
h = 500;
f1 = -3000;
f2 = -2200;
f3 = 100;
f4 = 160;
o = 0.01;
Plot[{fourkiteexact[x, a * -1000, a * 3000,
  a * -5000, y, b * 200, b * h, b * f, b * g, 0.92, 0.05, 0.025, 0.005],
  fourkitefirstorder[x, a * -1000, a * 3000, a * -5000, y, b * 200, b * h, b * f,
  b * g, 0.92, 0.05, 0.025, 0.005], fourkitewoodbury[x, a * -1000, a * 3000,
  a * -5000, y, b * 200, b * h, b * f, b * g, 0.92, 0.05, 0.025, 0.005]},
{x, f1, f2}, PlotRange -> {{f1, f2}, {f3, f4}}, FrameLabel -> None,
GridLines -> None, Axes -> None, BaseStyle -> {FontSize -> 13},
Frame -> True, FrameTicks -> None, PlotTheme -> "Monochrome",
PlotLegends -> {"kite numeric", "kite first order", "kite Woodbury"},
PlotStyle -> {Thickness[o]}]
a = 0.85;
b = 0.7;
d = 3;
y = 1250;
f = 500;
g = 1000;
h = 500;
f1 = 0;

```

```

f2 = 2000;
f3 = 8;
f4 = 15;
Plot[{fourkiteexact[x, a * -1000, a * 3000,
  a * -5000, y, b * 200, b * h, b * f, b * g, 0.92, 0.05, 0.025, 0.005],
  fourkitefirstorder[x, a * -1000, a * 3000, a * -5000, y, b * 200, b * h, b * f,
  b * g, 0.92, 0.05, 0.025, 0.005], fourkitewoodbury[x, a * -1000, a * 3000,
  a * -5000, y, b * 200, b * h, b * f, b * g, 0.92, 0.05, 0.025, 0.005]}],
{x, f1, f2}, PlotRange -> {{f1, f2}, {f3, f4}}, FrameTicks -> None,
GridLines -> None, FrameLabel -> None, Axes -> None,
BaseStyle -> {FontSize -> 13}, Frame -> True, PlotTheme -> "Monochrome",
PlotLegends -> {"kite numeric", "kite first order", "kite Woodbury"},
PlotStyle -> {Thickness[0.01]}]

```

Out[1040]=

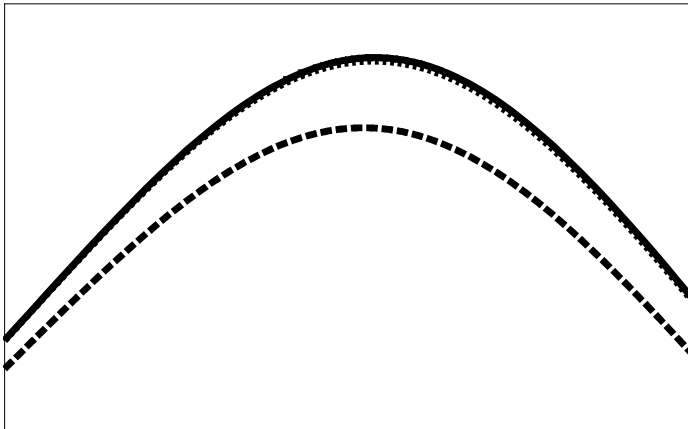

— kite numeric  
 - - - kite first order  
 ..... kite Woodbury

Out[1042]=

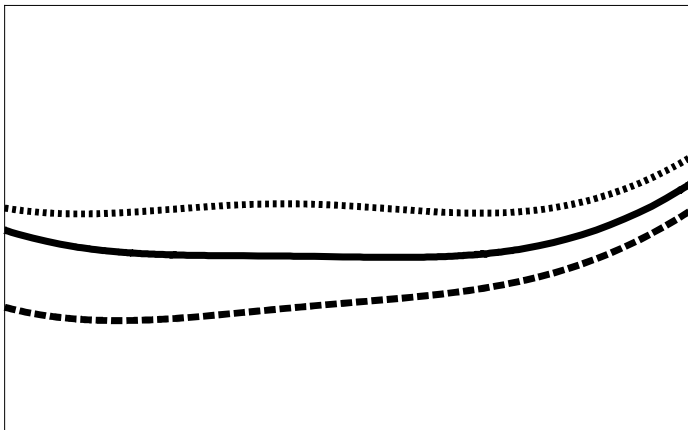

— kite numeric  
 - - - kite first order  
 ..... kite Woodbury
